# 1 Drug mechanism-of-action discovery through the 2 integration of pharmacological and CRISPR screens

3  
4 Emanuel Gonçalves<sup>1</sup>, Aldo Segura-Cabrera<sup>2</sup>, Clare Pacini<sup>1</sup>, Gabriele Picco<sup>1</sup>, Fiona M.  
5 Behan<sup>1</sup>, Patricia Jaaks<sup>1</sup>, Elizabeth A. Coker<sup>1</sup>, Donny van der Meer<sup>1</sup>, Andrew Barthorpe<sup>1</sup>,  
6 Howard Lightfoot<sup>1</sup>, GDSC Screening Team<sup>1</sup>, Andrew R. Leach<sup>2</sup>, James T. Lynch<sup>3</sup>, Ben  
7 Sidders<sup>3</sup>, Claire Crafter<sup>3</sup>, Francesco Iorio<sup>1,5</sup>, Stephen Fawell<sup>4</sup>, Mathew J. Garnett<sup>1</sup>,

- 8  
9  
10 1. Wellcome Sanger Institute, Wellcome Genome Campus, Hinxton, UK  
11 2. European Molecular Biology Laboratory, European Bioinformatics Institute, Hinxton, UK  
12 3. Research and Early Development, Oncology R&D, AstraZeneca, Cambridge, UK  
13 4. Research and Early Development, Oncology R&D, AstraZeneca, Waltham, MA 02451,  
14 USA  
15 5. Human Technopole, Via Cristina Belgioioso, 20157 Milano, Italy

16  
17 \* Corresponding author: [mg12@sanger.ac.uk](mailto:mg12@sanger.ac.uk)

18  
19  
20  
21  
22  
23  
24  
25  
26  
27  
28  
29  
30  
31  
32  
33  
34

35 **Keywords:** Drug response / CRISPR-Cas9 / Drug mechanism-of-action / Protein Networks

## 36 Abstract

37           **Low success rates during drug development are due in part to the difficulty of**  
38 **defining drug mechanism-of-action and molecular markers of therapeutic activity. Here,**  
39 **we integrated 199,219 drug sensitivity measurements for 397 unique anti-cancer drugs**  
40 **and genome-wide CRISPR loss-of-function screens in 484 cell lines to systematically**  
41 **investigate *in cellular* drug mechanism-of-action. We observed an enrichment for**  
42 **positive associations between drug sensitivity and knockout of their nominal targets,**  
43 **and by leveraging protein-protein networks we identified pathways that mediate drug**  
44 **response. This revealed an unappreciated role of mitochondrial E3 ubiquitin-protein**  
45 **ligase *MARCH5* in sensitivity to MCL1 inhibitors. We also estimated drug on-target and**  
46 **off-target activity, informing on specificity, potency and toxicity. Linking drug and gene**  
47 **dependency together with genomic datasets uncovered contexts in which molecular**  
48 **networks when perturbed mediate cancer cell loss-of-fitness, and thereby provide**  
49 **independent and orthogonal evidence of biomarkers for drug development. This study**  
50 **illustrates how integrating cell line drug sensitivity with CRISPR loss-of-function**  
51 **screens can elucidate mechanism-of-action to advance drug development.**

## 52 Introduction

53           Understanding drug mechanism-of-action and evaluating *in cellular* activity is  
54 challenging (Santos *et al*, 2017) and widespread target promiscuity contributes to low success  
55 rates during drug development (Klaeger *et al*, 2017). For target-based drug development, a  
56 detailed understanding of drug mechanism-of-action provides information about specificity  
57 and undesirable off-target activity which could lead to toxicity and reduced therapeutic window  
58 (Lin *et al*, 2019). Moreover, molecular biomarkers can be used to monitor drug activity and to  
59 identify contexts in which drugs are more effective as the basis for patient stratification during  
60 clinical development.

61

62           The cellular activity of a drug is influenced by multiple factors including the selectivity  
63 and affinity of the compound to its target(s) and the penetrance of target engagement on  
64 cellular phenotypes. An array of biochemical, biophysical, computational and cellular assays  
65 are currently used to investigate drug mechanism-of-action (Schenone *et al*, 2013). For  
66 example, protein kinase inhibitors are profiled *in vitro* for their specificity and potency against  
67 panels of purified recombinant protein kinases. While informative, this approach fails to  
68 recapitulate the native context of the full-length protein in cells which could influence drug  
69 activity, it does not identify non-kinase off-target effects, nor is it suitable to evaluate the

70 selectivity of compounds to non-kinase targets. Existing *in cellular* based approaches include  
71 transcriptional profiling following drug treatment of cells, chemical proteomics approaches  
72 such as kinobeads to measure drug-protein interactions, and multiplexed imaging or flow-  
73 cytometry to measure multiple cellular parameters upon drug treatment (Subramanian *et al*,  
74 2017; Li *et al*, 2017; Reinecke *et al*, 2019). Despite the utility of these different approaches,  
75 gaining a full picture of drug mechanism-of-action, particularly in cells, remains a challenge  
76 and new approaches would be beneficial.

77

78         Pharmacological screens (Barretina *et al*, 2012; Garnett *et al*, 2012; Iorio *et al*, 2016;  
79 Subramanian *et al*, 2017; Lee *et al*, 2018) have been used to profile the activity of hundreds  
80 of compounds in highly-annotated collections of cancer cell lines with the aim of identifying  
81 molecular markers of drug sensitivity to guide clinical development (Cook *et al*, 2014; Nelson  
82 *et al*, 2015). More recently, CRISPR-based gene-editing has enabled the evaluation of highly  
83 specific and penetrant gene-knockout effects on cell fitness genome-wide in hundreds of  
84 cancer cell lines (Jinek *et al*, 2012; Shalem *et al*, 2014; Hart *et al*, 2015; Meyers *et al*, 2017;  
85 Behan *et al*, 2019). This has provided rich functional resources to explore cancer  
86 vulnerabilities and new potential drug targets (Marcotte *et al*, 2016; Meyers *et al*, 2017;  
87 Tsherniak *et al*, 2017; Behan *et al*, 2019). Parallel integration of gene loss-of-function screens  
88 with drug response can be used to investigate drug mechanism-of-action (Deans *et al*, 2016;  
89 Subramanian *et al*, 2017; Jost & Weissman, 2018).

90

91         Here, we integrate recent genome-wide CRISPR-Cas9 loss-of-function screens with  
92 pharmacological data for 397 unique anti-cancer compounds in 484 cancer cell lines. We show  
93 that CRISPR-Cas9 datasets recapitulate drug targets, can provide insights into drug potency  
94 and selectivity, and define cellular networks underpinning drug sensitivity. This approach  
95 identified a link between mitochondrial ubiquitin ligase *MARCH5* in MCL1 inhibitors response,  
96 and specifically in breast cancer cell lines. Furthermore, we defined robust pharmacogenomic  
97 associations, represented by genetic biomarkers independently supported by drug response  
98 and gene fitness measurements. These identify genetic contexts associated with drug-  
99 pathway dependency and provide a more refined set of biomarkers. Taken together, we  
100 present here an approach to leverage pharmacological and CRISPR screening data to inform  
101 on drug *in cellular* mechanism-of-action to guide drug development.

## 102 Results

### 103 Cancer cell line drug sensitivity and gene fitness effects

104 We analysed datasets from a highly-annotated collection of 484 histologically diverse  
105 human cancer cell lines (Supplementary Table 1). These have been extensively genetically  
106 characterised and utilised for large-scale drug sensitivity testing and CRISPR-Cas9 whole-  
107 genome loss-of-function screens (Garnett *et al*, 2012; Iorio *et al*, 2016; Meyers *et al*, 2017;  
108 Picco *et al*, 2019; van der Meer *et al*, 2019). We expanded on published single agent drug  
109 sensitivity data (Garnett *et al*, 2012; Lynch *et al*, 2016; Iorio *et al*, 2016; Picco *et al*, 2019) to  
110 consider 199,219 IC50 values for 397 unique cancer drugs (480 drugs including duplicates,  
111 Supplementary Table 2). These encompassed FDA-approved cancer drugs, drugs in clinical  
112 development, and investigational compounds with multiple modes of action, including 24  
113 chemotherapeutic agents and 367 small molecule inhibitors. Drugs considered in this study  
114 had a response in at least 3 cell lines (IC50 lower than half of the maximum screened  
115 concentration) and 86% of all possible drug/cell line IC50 measurements have been evaluated  
116 (Supplementary Figure 1a, Supplementary Table 3). Two experimental protocols were used  
117 to generate the drug sensitivity measurements, termed here as GDSC1 (Iorio *et al*, 2016) and  
118 GDSC2 (Picco *et al*, 2019), chronologically ordered (Supplementary Figure 1b). A principal  
119 component analysis (PCA) of IC50 values identified a screen specific batch effect associated  
120 with principal component (PC) 2 which explained 2.8% of the total variance (Supplementary  
121 Figure 1c). For this reason, despite the fact that compounds screened with both technologies  
122 showed good agreement (n=66, mean Pearson's R=0.50), we analysed the measurements of  
123 the screens separately. Analysis of the drug response variation across cell lines revealed that  
124 PC 1 (28.7% variance captured) was significantly correlated with cell line growth rate  
125 (Pearson's R=-0.51, p-value=1.2e-28), particularly for chemotherapy agents and growth  
126 inhibitors (Supplementary Figure 1d and 1e).

127  
128 Cell fitness effects for 16,643 gene knockouts have been measured using genome-  
129 wide CRISPR-Cas9 screens at the Sanger and Broad Institutes (Meyers *et al*, 2017; Behan *et al*,  
130 2019; DepMap, 2019) (Supplementary Table 4). The first PC across the cell lines (6.8%  
131 variance explained) separated the two institutes of origin (Supplementary Figure 2a),  
132 consistent with a comparative analysis performed on an overlapping set of cell lines (Dempster  
133 *et al*, 2019). Growth rate was less significantly associated with CRISPR knockout response  
134 (Supplementary Figure 2b and 2c).

## 135 Gene knockout fitness effects correspond with drug targets

136 We began by investigating the extent to which drug sensitivity corresponded to  
 137 CRISPR knock-out of drug targets. We systematically searched for associations between drug  
 138 sensitivity and gene fitness effects across the 484 cell lines (Figure 1a). We expect this to  
 139 capture a variety of relationships ranging from direct drug-target interactions to more complex  
 140 associations arising from interactions with regulators of the drug target(s). We tested a total of  
 141 7,988,640 single-feature gene-drug associations using linear mixed regression models.  
 142 Potential confounding effects such as growth rate, culture conditions, data source and sample  
 143 structure were considered in the models. We identified 865 significant associations (FDR  
 144 adjusted p-value < 10%, Supplementary Table 5) between drug response and gene fitness  
 145 profiles (Figure 1b), termed hereafter as significant drug-gene pairs. For this analysis we were  
 146 able to manually curate the nominal therapeutic target(s) for 94.7% (n=376) of the anti-cancer  
 147 drugs (Supplementary Figure 3a and Supplementary Table 1).

148

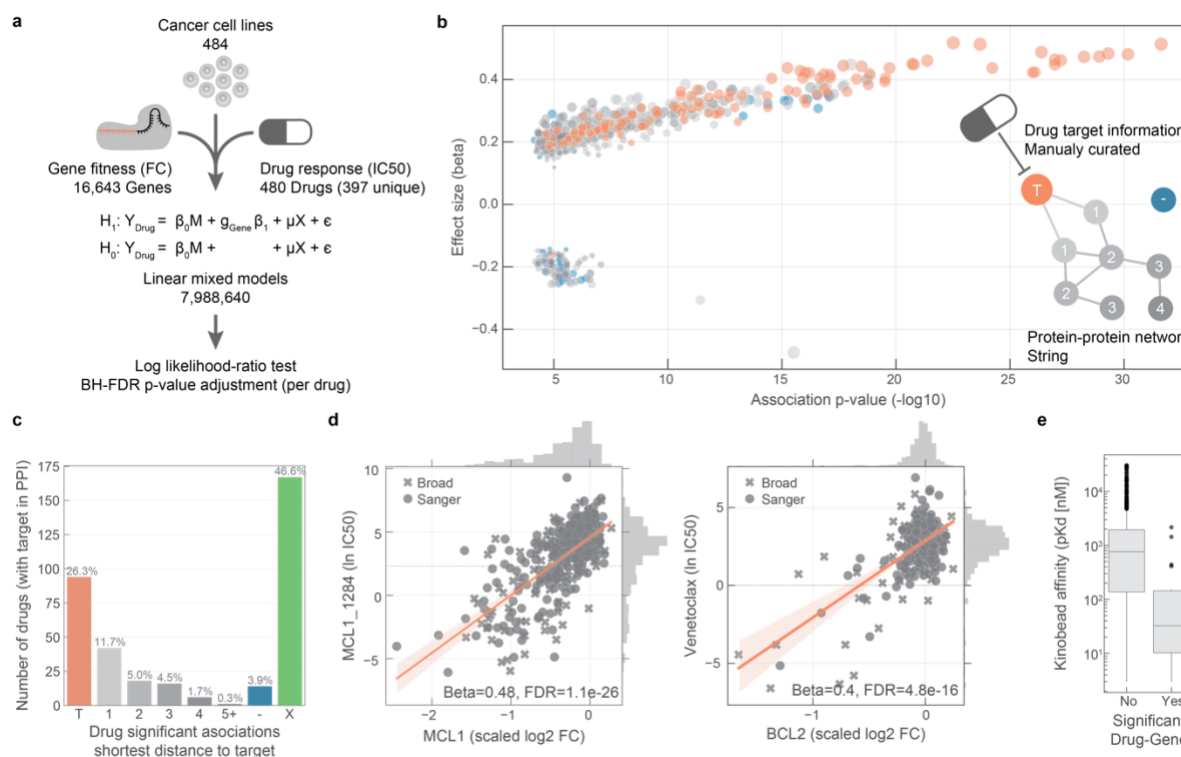

149

150 **Figure 1. Integration of drug and gene dependencies in cancer cell lines.** *a*, we used linear models to integrate  
 151 drug sensitivity and gene fitness measurements. *b*, volcano plot showing the effect sizes and the p-value for  
 152 statistically significant associations, Benjamini-Hochberg False Discovery Rate (FDR) adjusted p-value < 10%.  
 153 Drug-gene associated pairs are coloured according to their shortest distance in a protein-protein interaction  
 154 network of the gene to any of the nominal target of the drug. *c*, percentage of the 358 drugs with significant  
 155 associations and their closest distance to the drug nominal targets. T represents drugs that have a significant  
 156 association with at least 1 of their canonical targets and X are those which have no significant association. *d*,  
 157 representative examples of the top drug response correlations with target gene fitness. MCL\_1284 and Venetoclax  
 158 are MCL1 and BCL2 selective inhibitors, respectively. Gene fitness log2 fold-changes (FC) are scaled by using

159 *previously defined sets of essential (median scaled log<sub>2</sub> FC = -1) and non-essential (median scaled log<sub>2</sub> FC = 0)*  
160 *genes. Drug response IC<sub>50</sub> measurements are represented using the natural log (ln IC<sub>50</sub>). e, kinobead affinity is*  
161 *significantly higher (lower pK<sub>d</sub>) for compounds with a significant association with their target (n = 20, Mann-Whitney*  
162 *p-value=3.1e-07).*

163

164 For 26% (n=94) of the 358 drugs with target annotation and for which the target was  
165 knocked-out with the CRISPR-Cas9 libraries, we identified significant drug-gene pairs with  
166 their putative targets (Figure 1c). For example, there were strong associations between MCL1  
167 and BCL2 inhibitors and their knockouts (Figure 1d). Notably, drug-gene associations with the  
168 drug target had a skewed distribution towards positive effect sizes (Mann-Whitney U test p-  
169 value < 1.36e-105, Supplementary Figure 3b) and were among the strongest associations  
170 (Figure 1b). To investigate this further, we utilised independently acquired kinobead drug-  
171 protein affinity measurements for an overlapping 64 protein kinase inhibitors which were  
172 profiled for their specificity against 202 kinases (Klaeger *et al*, 2017). Drugs with significant  
173 associations with the target also had stronger affinity to their target in the kinobead assay,  
174 providing independent evidence that the strongest drug-gene associations are enriched for  
175 targets of the drugs (Figure 1e). Overall, we identified the nominal target of approximately one  
176 quarter of the drugs tested using orthogonal CRISPR gene fitness screens, and drug targets  
177 were amongst the most significant associations.

178

## 179 **Cellular networks underpinning drug response**

180 The remaining 74% (n=264) of drugs were not significantly associated with the  
181 CRISPR loss-of-function measurements of their nominal targets (Figure 1c). We reasoned  
182 that superimposing the significant drug-gene pairs onto a protein interaction network may shed  
183 further insight into drug mechanism-of-action. We used a protein-protein interaction (PPI)  
184 network assembled from STRING database (Szklarczyk *et al*, 2017) (10,587 nodes and  
185 205,251 interactions), and for the significant drug-genes pairs calculated the distances  
186 between the drug nominal targets and the associated gene-products. For 76 drugs no  
187 significant association with their target was identified, but instead had a significant association  
188 with their target's first neighbour or a protein closely related in the network (1, 2 or 3 PPI  
189 interactions distance from any of the drug targets) (Figure 1b and c). Thus, 47.5% of the  
190 annotated compounds (n=170) had an association with either the target or a functionally-  
191 related protein.

192

193 The strongest drug-gene pair associations were between the drug and the canonical  
194 targets rather than components of the PPI network, and significance decreased (along with

195 the number of associations) as the interaction distance increased (Figure 2a). To exclude that  
196 this observation is related to the topology of the network, we calculated the length of all the  
197 shortest paths between the drug targets and their associated genes and confirmed the  
198 enrichment of first and second neighbours in significant drug-gene associations  
199 (Supplementary Figure 3c). In comparison, cell line gene expression profiles are less powered  
200 to identify associations with the PPI neighbours of the drug target (Figure 2b; Supplementary  
201 Table 6). In particular, the number of drugs significantly associated with their targets  
202 substantially decreased (n=17) and significant associations were predominantly found with  
203 gene-products further away in the PPI network and close to the average length of all paths ( $l_G$   
204 = 3.9). As an example, MIEN1 gene expression is significantly correlated with multiple EGFR  
205 and ERBB2 inhibitors which can be explained, not by a functional relationship, but by genomic  
206 co-localisation with *ERBB2* on chromosome 17. Hence, CRISPR measurements are more  
207 powered than gene expression to identify drug functional interaction networks.

208

209 To investigate putative regulatory networks for drugs, we weighted the PPI network  
210 edges with the correlation between the fitness profiles of the two connected nodes and  
211 integrated the resulting weighted network with drug response associations. *EGFR* inhibitors  
212 are the most abundant drug class in our set, and we observed that multiple inhibitors (e.g.  
213 cetuximab) showed significant associations with *EGFR* and known pathway members, for  
214 example *SHC1* and *GRB2* (Zheng *et al*, 2013; Scaltriti & Baselga, 2006) (Figure 2c).  
215 Additionally, the weighted network shows pathway members that have strongly correlated  
216 fitness profiles, which are likely functionally related (Pan *et al*, 2018). For EGFR inhibitors  
217 these included tyrosine receptor kinases *NTRK3* and *MET*, and the protein phosphatase  
218 *PTPN11* (Wang *et al*, 2017; Pan *et al*, 2018) (Figure 2d). Drug-target tailored networks can be  
219 used to understand drug mechanism-of-action, and have the potential to identify resistance  
220 mechanisms and propose alternative targets in the network.

221

222 Despite our finding that we can illuminate drug functional networks, 46.6% (n=167) of  
223 the tested drugs had no significant drug-gene associations. This could in part be explained by  
224 lower variability in CRISPR fold change measurements for the target of these drugs (Figure  
225 2e). For example, where genetic knockout induces strong uniform loss-of-fitness effects in  
226 contrast to incomplete target inhibition by a drug (Supplementary Figure 3d). Additionally,  
227 inhibition of a protein is intrinsically different than a knockout, as observed for PARP inhibitors  
228 whose activity is mediated through formation of cytotoxic PARP-DNA complexes, whereas as  
229 PARP knockout has little or no effect on cells (Gill *et al*, 2015; Murai & Pommier,  
230 2015)(Supplementary Figure 3e). A lack of variability was much less pronounced in the drug  
231 sensitivity measurements since we only considered drugs which showed a minimal level of

232 activity, i.e. IC50 lower than half of the maximum screened concentration (Supplementary  
 233 Figure 3f). Drugs with no significant association were also approximately 3 times less likely to  
 234 be associated with a genomic biomarker linked to sensitivity (Supplementary Figure 3g). Thus,  
 235 the absence of an association between drug sensitivity and CRISPR loss-of-function effects  
 236 could warrant further investigation into drug mechanism-of-action to understand possible  
 237 underlying factors, such as low potency, alternative molecular mechanisms, or  
 238 polypharmacology. Collectively, our network analysis demonstrates that CRISPR screens can  
 239 provide functional insights into drug *in cellular* activity extending beyond the direct drug target  
 240 into the associated functional network.

241

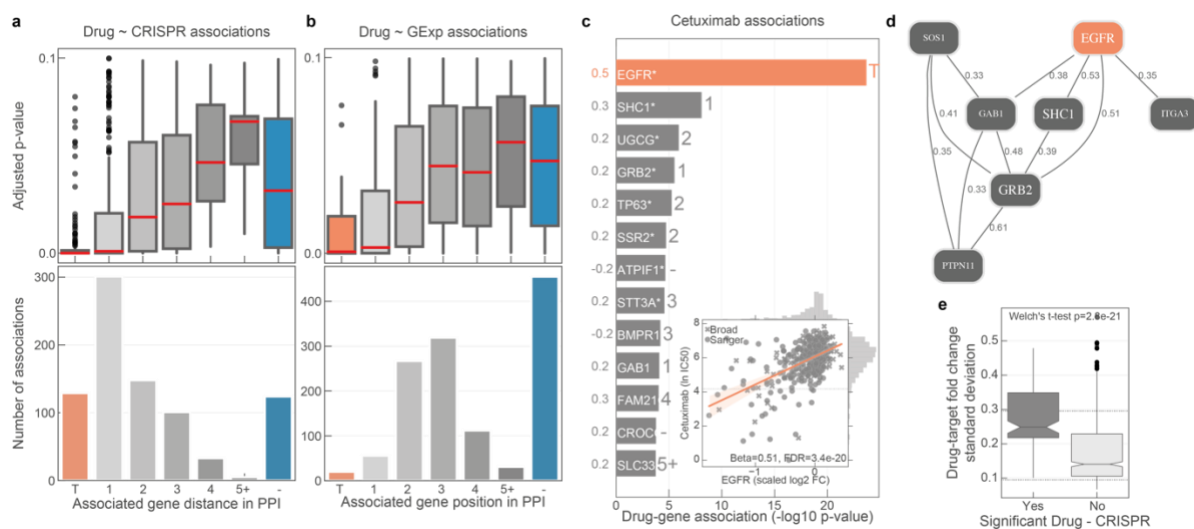

242

243 **Figure 2. Drug response protein-protein networks.** **a**, distribution of the FDR adjusted *p*-values (top) and count  
 244 (bottom) of the significant drug-gene (CRISPR) associations according to their distance between the gene and  
 245 corresponding drug targets in the protein-protein interaction network. **b**, similar to **a**, but instead gene expression  
 246 (GExp) was tested to identify associations with drug response. **c**, representative example (cetuximab - EGFR  
 247 inhibitor) of the associations and **d**, networks that can be obtained from the integrative analysis. Edges in the  
 248 network are weighted with the Pearson correlation coefficient obtained between the fitness profiles of interacting  
 249 nodes. **e**, drug-target associations stratified by statistical significance and plotted against the standard deviation of  
 250 the drug-target CRISPR fold changes. Upper and lower dashed lines represent the standard deviations of essential  
 251 and non-essential genes, respectively.

## 252 Cancer drugs mechanism-of-action

253 Next, we set out to investigate in detail some of the strongest drug sensitivity and gene  
 254 fitness associations (Supplementary Table 5). Strikingly, 46 of the top 50 strongly associated  
 255 drugs have significant associations with their nominal target and with known functionally  
 256 related genes (Figure 3). Some of the strongest associations were between MCL1 inhibitors  
 257 and their target fitness effects (Figure 1d), including AZD5991 which is currently in clinical  
 258 trials for treatment of hematologic cancers (Hird *et al*, 2017). Additionally, for several Insulin-



259 Like Growth Factor 1 Receptor (*IGFR1*) inhibitors the association with the target was  
260 recapitulated. Moreover, significant associations with proprotein convertase *furin* were  
261 observed, supporting the known genetic association that *IGFR1* is a *furin* substrate, and  
262 increased levels of *furin* are associated with increased levels of processed IGFR1 and worse  
263 prognosis in several cancers (Thomas, 2002).

264

265 Protein kinase inhibitors are an important class of cancer drugs (Santos *et al*, 2017).  
266 Because of the conserved structural features of the commonly targeted kinase domain, the  
267 clinical development of kinase inhibitors is hampered by poor selectivity, which consequently  
268 may lead to undesirable off-target activity (Klaeger *et al*, 2017). Furthermore, some kinases  
269 have multiple isoforms with non-redundant roles in tissues, as exemplified by the clinical  
270 development of PI3K inhibitors, and this has led to the development of isoform-selective  
271 inhibitors to reduce toxicity and increase the therapeutic window (Thorpe *et al*, 2015).  
272 Interestingly, several PI3K inhibitors had strong associations with only one gene encoding a  
273 single isoform (Figure 3), this together with the increased kinobead binding affinity of  
274 significant associations (Figure 1e), suggests these are isoform selective compounds. For  
275 example, alpelisib (Figure 3 first row) was associated with *PIK3CA*, consistent with its  
276 development as an alpha-isoform selective compound (Thorpe *et al*, 2015), whereas AZD8186  
277 (Figure 3 second row) was only associated with *PIK3CB* confirming its beta-selectivity.  
278 Conversely, two *pan*-PI3K inhibitors (buparlisib and omipalisib) displayed no significant  
279 association with any *PI3K* isoform (Supplementary Table 5), consistent with less isoform  
280 specificity and potential polypharmacology. Interestingly, MTOR and *pan*-PI3K inhibitor,  
281 dactolisib, had significant associations with *RPTOR* and *MTOR* but none with *PI3K* isoforms  
282 (Supplementary Table 5), consistent with recently reported greater specificity for inhibition of  
283 the MTOR complex (Reinecke *et al*, 2019). Similarly, we observed that selective EGFR  
284 inhibitors cetuximab, erlotinib and gefitinib (Figure 3 second and third rows) were associated  
285 with *EGFR* but not *ERBB2*, whereas afatinib, poziotinib and sapatinib (AZD8931) (Figure 3  
286 fourth and fifth rows) were all associated with both *EGFR* and *ERBB2*. Furthermore, we  
287 observed isoform selectivity of different FGFR inhibitors.

288

289 Our analysis can also provide insights into possible off-target activity of drugs.  
290 Unsupervised clustering of the drug-gene associations effect sizes (betas) revealed classes  
291 of inhibitors with similar targets and mechanism-of-action (Supplementary Figure 3h). Of note,  
292 BTK inhibitor, ibrutinib, clustered with EGFR inhibitors and displayed significant associations  
293 with EGFR and ERBB2 gene fitness. This is consistent with recent findings that ibrutinib  
294 covalently bind and inhibit EGFR (Lee *et al*, 2018), and is also supported by kinobead  
295 measurements (Klaeger *et al*, 2017). Additionally, 24 compounds have significant associations

296 with genes identified as core fitness (Behan *et al*, 2019) across multiple cancer types,  
 297 indicating an increased risk of cellular toxicity. Out of these, two compounds, PD0166285 and  
 298 CCT244747, have significant associations with their nominal target (*PKMYT1* and  
 299 *CHEK1/WEE1*) and the remaining compounds (n=22) are correlated with proteins closely  
 300 connected in the PPI network.  
 301

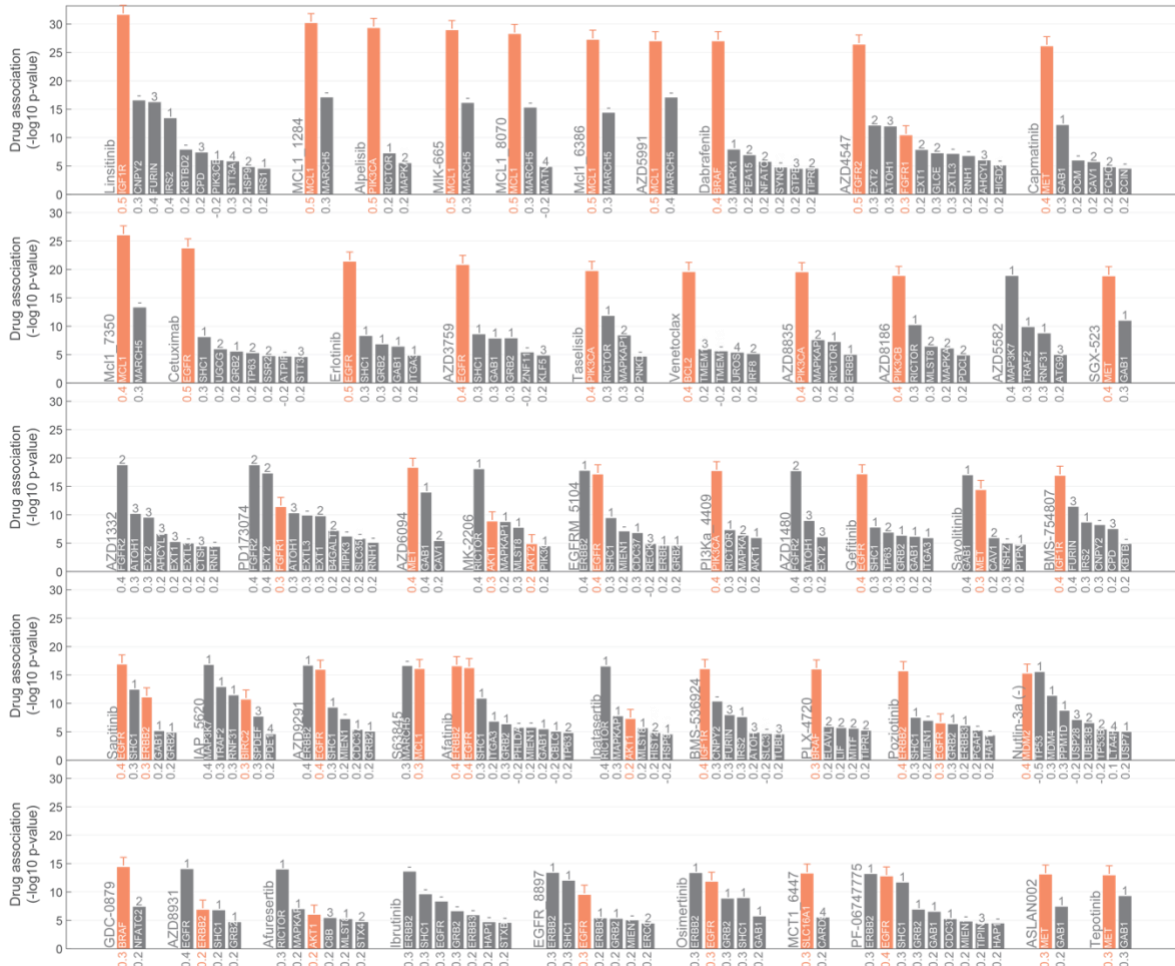

302  
 303 **Figure 3. Top 50 most significantly associated drugs.** Each bar plot group represents a unique drug where  
 304 genes are ranked by statistical significance of their association. Effect sizes of the associations are reported under  
 305 the bars along the x axis. Shortest distance (number of interactions) in a protein-protein interaction network  
 306 between the gene and the drug nominal target(s) is represented on the top of the bars, where T and orange bar  
 307 represent the target and '-' represents no link was found.

### 308 A functional link between *MARCH5* and *MCL1* inhibitor sensitivity

309 Seven out of nine inhibitors of the anti-apoptotic *BCL2* family member myeloid cell  
 310 leukemia 1 (*MCL1*) were strongly and nearly exclusively associated with their putative target,  
 311 suggesting these are potent and specific compounds in cells (Figure 4a). *MCL1* is frequently  
 312 amplified in human cancers (Beroukhim *et al*, 2010) and associated with chemotherapeutic

313 resistance and relapse (Wuillème-Toumi *et al*, 2005; Wei *et al*, 2006). MCL1 is a negative  
314 regulator of the mitochondrial apoptotic pathway, regulating *BAX/BAK1* which co-localise with  
315 *Drp1/Fis1* in the mitochondria outer membrane and control mitochondrial fragmentation and  
316 cytochrome c release, both of which are important for inducing apoptosis (Youle & Karbowski,  
317 2005; Mojsa *et al*, 2014; Morciano *et al*, 2016). Interestingly, knockout of a key regulator of  
318 mitochondrial fission, mitochondrial E3 ubiquitin-protein ligase *MARCH5* (Karbowski *et al*,  
319 2007), is significantly associated with MCL1 inhibitors sensitivity (Supplementary Figure 4a),  
320 and positively correlated with MCL1 gene fitness, suggesting a functional relationship (Figure  
321 4b). A recent study confirmed a synthetic-lethal interaction between *MARCH5* and well know  
322 *MCL1* negative regulator *BCL2L1* using dropout screens in isogenic cancer cell lines  
323 (DeWeirdt *et al*, 2019). Correlation between *MCL1* and *MARCH5* fitness profiles shows that  
324 cell lines dependent on *MARCH5* are also dependent on *MCL1*, while the inverse is not  
325 necessarily true with a subgroup of cell lines dependent on *MCL1* but not on *MARCH5*. Cell  
326 lines independently dependent on both gene-products have increased sensitivity to MCL1  
327 inhibitors (Supplementary Figure 4b). This is particularly marked in breast carcinoma cancer  
328 cell lines, with *MCL1* and *MARCH5* dependent cells having similar sensitivity to hematologic  
329 cancer cell lines (acute myeloid leukemia), where MCL1 inhibitors are in clinical development  
330 (Figure 4c).

331  
332 We investigated the potential molecular mechanisms underlying MCL1 inhibitors  
333 response. MCL1 copy number and gene expression alone are not a good predictor of MCL1  
334 inhibitors sensitivity (Figure 4d, Supplementary Figure 4c). This is in contrast to BCL2 and  
335 BCL2L1 inhibitors, where their target gene expression is significantly correlated with drug  
336 sensitivity (Figure 4d). Next, we used multilinear regression models to predict sensitivity to  
337 each MCL1 inhibitor using gene fitness and/or gene expression of known regulators of *MCL1*  
338 (e.g. *BCL2*, *BCL2L1*, *BAX*) (Czabotar *et al*, 2014) and *MARCH5*. For two MCL1 inhibitors,  
339 MIM1 and UMI-77, the trained models performed poorly likely due to lack of *in cellular* activity  
340 of these compounds. For the remaining seven MCL1 inhibitors, drug response was well  
341 predicted (CRISPR+GEXP mean R-squared=0.55). Models trained with only CRISPR  
342 displayed overall better predictions compared to models only trained with gene expression,  
343 and models trained with both data types out-performed all others (Figure 4e). As expected,  
344 MCL1 fitness-effect was the most predictive feature, followed by BCL2L1 expression and  
345 MARCH5 essentiality (Figure 4f). No genomic feature, mutation or copy number alterations  
346 correlated significantly with MCL1 inhibitors response, including *MCL1* amplifications  
347 (Supplementary Figure 4c), likely a consequence of the strong post-transcriptional regulation  
348 and short half-life of MCL1.  
349

350 Altogether, we highlight a functional link between *MARCH5* and MCL1 inhibitors  
351 sensitivity. With further investigation, this could shed light on MCL1 inhibitor mechanism and  
352 the development of stratification approaches in solid tumours, such as breast carcinomas.  
353

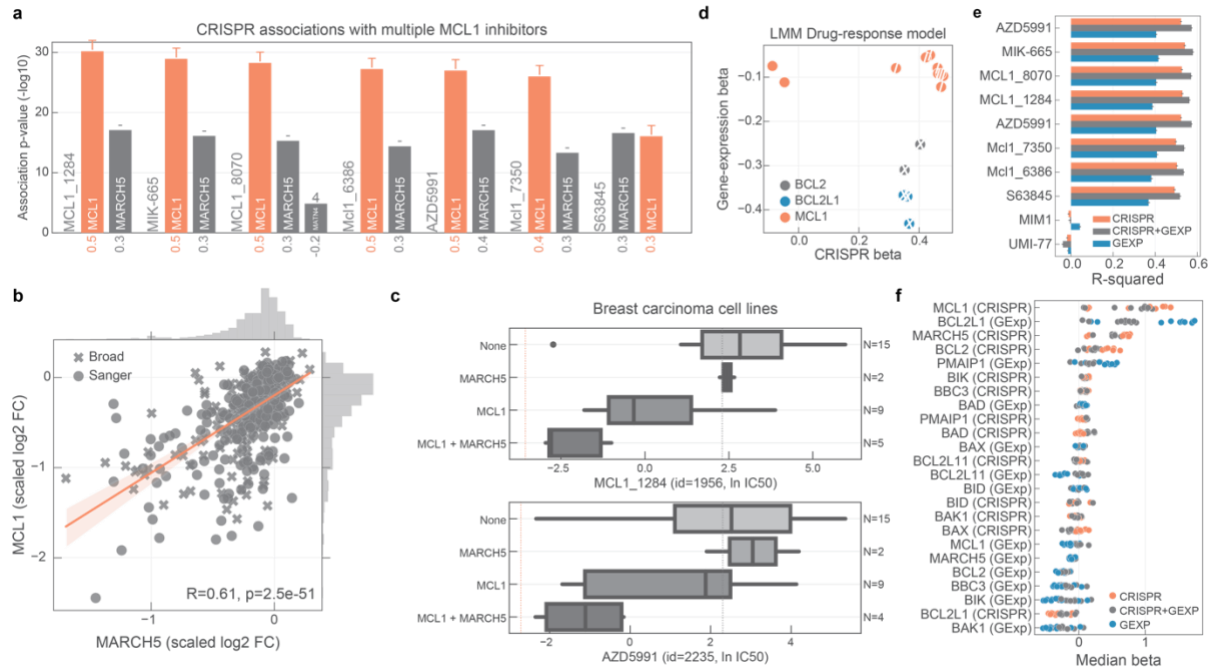

354 **Figure 4. MCL1 inhibitors associations.** **a**, significant associations with MCL1 inhibitors (7 out of 9 included in  
355 the screen). **b**, association between the gene fitness profiles of MCL1 and MARCH5. **c**, stratification of the MCL1  
356 inhibitor sensitivity according to the essentiality profile of MCL1 and MARCH5, where MCL1 + MARCH5 represents  
357 a cell line that is independently dependent on both genes. Dashed orange line (left) represents the mean IC50 in  
358 acute myeloid leukemia cell lines. Grey dashed line (right) represents the maximum concentration used in the  
359 dosage response curve. **d**, BCL2, BCL2L1 and MCL1 inhibitors and the respective association with their targets,  
360 on the x axis with CRISPR gene fitness and on the y axis with gene expression. The statistical significance of the  
361 association is represented with a backward slash for CRISPR and forward slash for GEXP. **e**, regularised  
362 multilinear regression to predict drug response of all MCL1 inhibitors using gene expression, fitness or both of  
363 known regulators of the BCL2 family and MARCH5. Predictive performance is estimated using  $R_2$  metric  
364 represented in the x axis. **f**, effect size of each feature used in each MCL1 inhibitor model.

## 366 Robust molecular markers of drug sensitivity networks

367 The identification of molecular biomarkers of drug sensitivity is fundamental to guide  
368 clinical drug development. We hypothesized that molecular biomarkers independently linked  
369 with both drug response and gene fitness would be of particularly high value – termed robust  
370 pharmacogenomic biomarkers. To identify these, we used the set of significant drug-gene  
371 pairs (n=865) and we searched independently for significant associations between each  
372 measurement type in each pair (drug response or gene fitness) and 519 genomic (mutations  
373 and copy number alterations) and 15,368 gene expression features (Figure 5a,  
374 Supplementary Figure 5a) (Garnett *et al*, 2012; Iorio *et al*, 2016; Garcia-Alonso *et al*, 2018).

375 This analysis recapitulated established genomic and expression biomarkers of either drug  
376 sensitivity or gene fitness effects in cancer cells (Supplementary Figure 5b and c). A total of  
377 224 and 679 robust pharmacogenomic associations were identified with genomic  
378 (Supplementary Table 7) and gene expression features (Supplementary Table 8),  
379 respectively. Overall, 30.6% (265 of 865) of drug-gene pairs have at least one robust  
380 molecular marker that correlated significantly with both drug response and gene fitness (Figure  
381 5b). The number of robust biomarkers was smaller than the number of biomarkers associated  
382 with only one type of measurement, likely due to the stringent requirement for an association  
383 with both drug sensitivity and gene fitness effects.

384

385 From the subset of 129 drug-gene pair associations that were linked by the drug target,  
386 50.4% (n=65) had one or more robust pharmacogenomic associations (Supplementary Figure  
387 5d). Most of these were established dependencies of cancer cells, including: Nutlin-3a  
388 sensitivity associated with *TP53* mutation status; *BRAF* and *PIK3CA* mutation induced  
389 CRISPR dependency; olaparib sensitivity mediated by the presence of *EWSR1-FLI1* fusion,  
390 also recapitulated by *FLI1* essentiality profile; MCL1 inhibitors biomarker association with  
391 *BCL2L1*, and nutlin-3a with BAX expression (Figure 5c and Supplementary Figure 5e and 5f).  
392 Similarly, of the 413 significant gene-drug pairs closely related within the PPI network ( $\leq 3$   
393 interactions from the drug target), we identified robust pharmacogenomic associations for  
394 29.5% (n=122) (Supplementary Figure 5d), enabling the discovery of cellular contexts where  
395 drug response networks are important. For example, we identified increased tumour necrosis  
396 factor (*TNF*) expression as a robust pharmacogenomic marker for drugs targeting the  
397 downstream cellular inhibitor of apoptosis (cIAP) proteins *BIRC2* and *BIRC3* (e.g. IAP\_5620),  
398 and based on CRISPR dependency data, for multiple members of the cIAP pathway, including  
399 *BIRC2*, *MAP3K7* and *RNF31* (Beug *et al*, 2012) (Figure 5d).

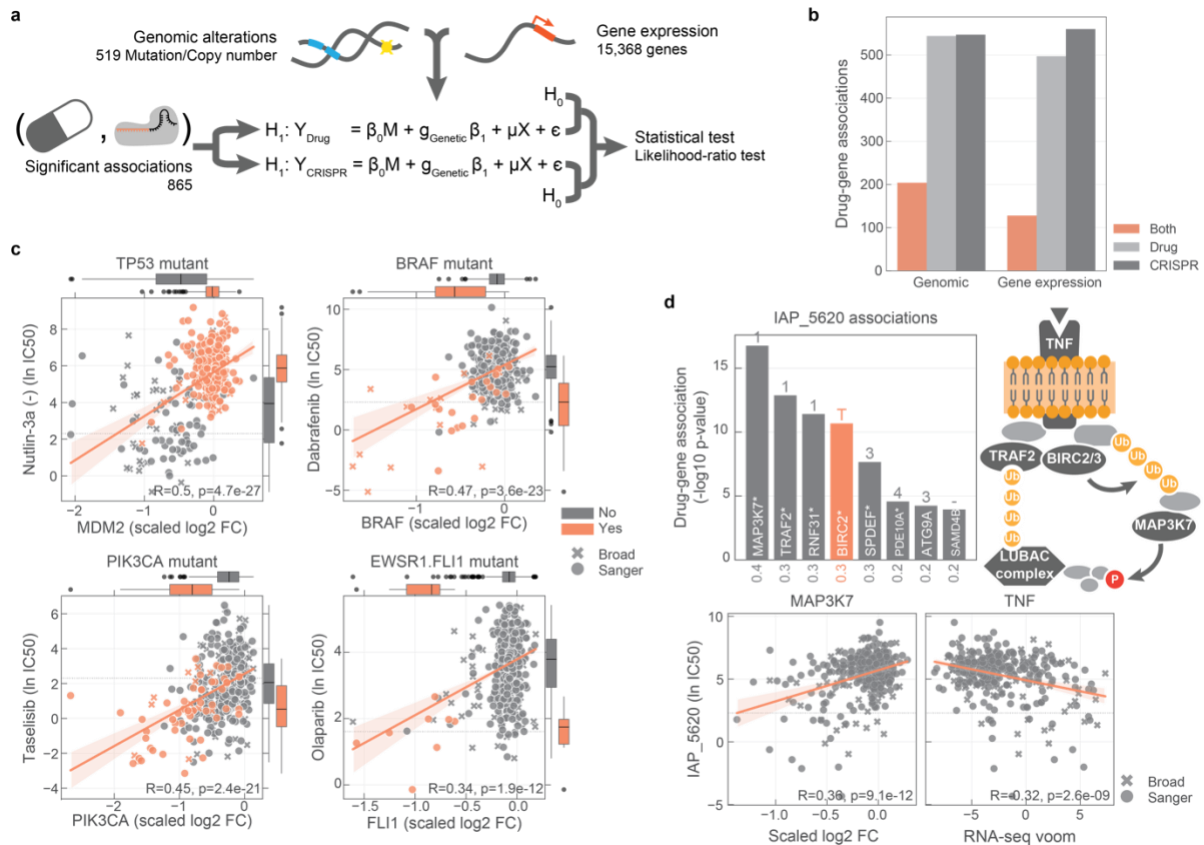

400  
401  
402  
403  
404  
405  
406  
407

**Figure 5. Robust pharmacological associations.** *a*, diagram representing how genomic and gene expression data-sets are integrated to identify significant associations with drug-gene pairs that were previously found to be significantly correlated. *b*, number of drug-gene pairs with at least one significant association with drug response, gene fitness or both, considering either genomic or gene expression profiles. *c*, canonical examples of robust pharmacological associations. *d*, representative example of a BIRC2/BIRC3 inhibitor, IAP\_5620, showing the significant associations with CRISPR gene fitness profiles and their location in a representation of the TNF pathway.

## 408 Discussion

409 Understanding drug mechanism-of-action and the biological pathways underpinning  
410 drug response is an important step in preclinical studies. Here, we demonstrate how the  
411 integration of drug sensitivity and CRISPR-Cas9 gene fitness data can be used to inform on  
412 multiple aspects of drug mechanisms in cells, including drug specificity and potency. Our  
413 analysis recapitulated drug targets for approximately a quarter of drugs tested and for  
414 approximately another quarter revealed associations enriched for proteins closely related with  
415 the drug target. Critically, the strength of these associations reflects specificity and  
416 polypharmacology of the cancer drugs. Furthermore, these associations define networks of  
417 protein interactions that are functionally related with drug targets and underpin drug response.  
418 This revealed a previously unappreciated interaction between *MARCH5* and *MCL1* inhibitors,  
419 with potential utility to derive predictive models of *MCL1* inhibitor response across multiple

420 cancer types, and particularly in solid tumours such as breast carcinomas. Robust  
421 pharmacogenomic biomarkers leveraged both datasets to provide refined biomarkers that are  
422 correlated with both drug response and biological networks. Interestingly, the networks we  
423 have defined can provide alternative targets that are functionally related with the drug target  
424 and mediate similar effects on cell fitness, potentially providing strategies for combination  
425 therapies to limit therapy resistance.

426

427 Pre-clinical biomarker development is an important step in drug discovery and is  
428 associated with increased success rates during clinical development (Nelson *et al*, 2015).  
429 Traditionally this has been performed by building predictive models of drug response using  
430 mutation, copy number and gene expression (Iorio *et al*, 2016; Tsherniak *et al*, 2017). Here  
431 we extended this approach, and propose what we term as robust pharmacogenomic  
432 association - a drug response and gene fitness pair that are significantly correlated and are  
433 also both significantly related to the same molecular biomarker. This approach gives greater  
434 confidence in molecular biomarkers identified, since they are recapitulated using data from  
435 two orthogonal assays and provides markers at the level of the network. In addition, by  
436 focusing only on drugs involved in significant gene-drug pairs, we enrich for drugs most likely  
437 to have greater specificity, and thereby better enabling biomarker discovery.

438

439 Nearly half of the drugs did not have a significant association with gene fitness effects  
440 and may warrant further investigation. Possible explanations for this include: (i) drug  
441 polypharmacology which is difficult to deconvolute using single gene knockout data; (ii)  
442 intrinsic difference between protein inhibition and knockout; (iii) a dosage dependent response  
443 leading to incomplete inhibition of the drug target; (iv) functional redundancy between protein  
444 isoforms resulting in less penetrant effects with gene knockout; and (v) limitations of the  
445 sgRNA efficacy across the cancer cell lines. We expect that some of these issues can be  
446 addressed by expanding this analysis to integrate other types of functional genomic screens,  
447 such as CRISPR inhibition, which might mimic drug inhibition more closely.

448

449 This study extends previous efforts, and utilises new CRISPR loss-of-function  
450 datasets, to study drug mechanism-of-action in cells with unparalleled scale and precision.  
451 We anticipate this approach to be useful for many compounds, and could become a routine  
452 step during drug development. In particular, it is likely to have utility during the hit-to-lead  
453 optimisation stage of drug development to select lead chemical series and compounds with  
454 optimal potency and selectivity. The utility of this approach is likely to expand as the availability  
455 of CRISPR knock-out screening data, and other datasets such as CRISPR activation and  
456 inhibition, increases across ever larger collections of highly-annotated cancer cell models. In

457 conclusion, this study illustrates a new approach for investigating *in cellular* drug mechanism-  
458 of-action that can be applied to multiple critical aspects of drug development.  
459

## 460 **Materials and Methods**

### 461 **Table of contents**

462

- 463 **1. Cancer cell lines panel**
- 464 **2. High-throughput drug sensitivity**
- 465 **3. Genome-wide CRISPR-Cas9 dropout screens**
- 466 **4. PCA of drug sensitivity and gene fitness**
- 467 **5. Drug response linear mixed model associations**
- 468 **6. Protein-protein interaction network**
- 469 **7. Robust pharmacogenomic associations**
- 470 **8. Predictive models of drug response of MCL1 inhibitors**
- 471 **9. Code availability**

472

### 473 **1. Cancer cell lines panel**

474 The 484 cancer cell lines used in this manuscript have been compiled from publicly  
475 available repositories as well as private collections and maintained following the supplier  
476 guidelines. STR and SNP fingerprints were used to ensure cell lines selected were genetically  
477 unique and matched those in public repositories  
478 ([http://cancer.sanger.ac.uk/cell\\_lines/download](http://cancer.sanger.ac.uk/cell_lines/download)). Detailed cell line model information is  
479 available through Cell Model Passports database (<https://cellmodelpassports.sanger.ac.uk/>)  
480 (van der Meer *et al*, 2019). Cell lines growth rate is represented as the ratio between the mean  
481 of the untreated negative controls measured at day 1 (time of drug treatment) and the mean  
482 of the DMSO treated negative controls at day 4 (72 hours post drug treatment).

### 483 **2. High-throughput drug sensitivity**

484 Experimental details of both GDSC1 and GDSC2 screens can be found in the  
485 Genomics of Drug Sensitivity in Cancer (GDSC) project ([www.cancerRxgene.org](http://www.cancerRxgene.org)) (Yang *et al*,  
486 2013). Cell viability and dose response curve fitting models were previously described in detail  
487 (Iorio *et al*, 2016; Vis *et al*, 2016). Maximum screened drug concentration ( $\mu\text{M}$ ) are provided



488 in Supplementary Table 1. Each compound was measured on average across 393 cell lines  
489 rendering a nearly complete matrix with only 14.2% missing values. All considered compounds  
490 displayed an IC50 lower than half of the maximum screened concentration in at least 3 cell  
491 lines. This filter ensures the compounds display an informative profile in at least a small subset  
492 of the cell lines. Drug nominal oncology target annotation was manually curated from literature  
493 (Supplementary Table 1).

494

### 495 **3. Genome-wide CRISPR-Cas9 dropout screens**

496 The CRISPR-Cas9 screens for the 484 cancer cell lines considered in this study  
497 (Supplementary Table 2) were assembled from two distinct projects, 320 were generated as  
498 part of Sanger DepMap Project Score (Behan *et al*, 2019) and 164 from the Broad DepMap  
499 version 19Q3 (Meyers *et al*, 2017; DepMap, 2019). Only cell lines that passed quality control  
500 filtering similarly to Behan *et al*. (2019) and with matched drug response measurements were  
501 considered. Different CRISPR-Cas9 sgRNA libraries were used in each project (Koike-Yusa  
502 *et al*, 2014; Doench *et al*, 2016; Tzelepis *et al*, 2016). Consequently, library-specific effects  
503 were present (Dempster *et al*, 2019) (Supplementary Figure 2a) which hampers averaging of  
504 cell lines that were screened in both data-sets. Thus, for the overlapping cell lines only data  
505 from Sanger DepMap Project Score was used. This also minimises potential cell line specific  
506 differences, for example due to genetic drift (Ben-David *et al*, 2018), and thereby increasing  
507 concordance with the drug response data-set also generated at the Wellcome Sanger  
508 Institute. Fold changes ( $\log_2$ ) were estimated comparing samples with the respective control  
509 plasmid. As copy number profiles were not available for all of the cell lines, gene-independent  
510 deleterious effects induced by copy number amplifications in CRISPR-Cas9 screens (Aguirre  
511 *et al*, 2016; Munoz *et al*, 2016; Gonçalves *et al*, 2019) were corrected on a per sample basis  
512 using the unsupervised method CRISPRcleanR (Iorio *et al*, 2018). Replicates were mean  
513 averaged and gene level fold changes were estimated by taking the mean of all the mapping  
514 sgRNAs. Gene level fold changes were quantile normalised per sample and then median  
515 scaled using previously defined lists of cancer cell lines essential and non-essential genes  
516 (Hart *et al*, 2015), thus essential genes have a median  $\log_2$  fold change of -1 and non-essential  
517 genes a median  $\log_2$  fold change of 0. Only overlapping genes between the two libraries were  
518 considered, thus generating a full matrix of 16,643 genes across the 484 cell lines. A cell line  
519 was considered dependent on a gene if the knockout had a  $\log_2$  fold change of at least 50%  
520 of that expected of essential genes (scaled  $\log_2$  fold change  $< -0.5$ ).

## 521 4. PCA of drug sensitivity and gene fitness

522 Principal component analysis (PCA) was performed using scikit-learn (v0.21.2)  
523 (Pedregosa *et al*, 2011) using sklearn.decomposition.PCA with default parameters and the  
524 number of components (n\_components) set to 10. For the drug response data-set, and only  
525 for the PCA analysis, missing values of each drug were imputed using the drug mean IC50  
526 response across the rest of the cell lines. Imputation was not required for the CRISPR-Cas9  
527 data-set since the matrix had no missing values.

## 528 5. Drug response linear mixed model associations

529 Associations between drug response and gene fitness scores were performed using  
530 an efficient implementation of mixed-effect linear models available in the LIMIX Python module  
531 (v3.0.3) (Lippert *et al*, 2014; Casale *et al*, 2017). We considered the following covariates in the  
532 model: (i) binary variables indicating the institute of origin of the cell line CRISPR-Cas9 screen;  
533 (ii) principal component 1 of the drug response data-set which is a correlative of cell lines  
534 growth rate; and (iii) growing conditions (adherent, suspension or semi-adherent) represented  
535 as binary variables. Additionally, gene fitness similarity matrix of the samples is considered as  
536 random effects in the model to account for potential sample structure. Taken together, we  
537 fitted the following mixed linear regression model for each drug-gene pair:

538

$$539 [1] \quad d = \beta_0 M + \beta_1 e + \mu X + \varepsilon$$

540

541 Where,  $d$  represents a vector of the drug response IC50 values across the cell lines;  
542  $M$  is the matrix of covariates and  $\beta_0$  is the vector of effect sizes;  $e$  is the vector of gene  
543 CRISPR-Cas9 log2 fold changes and  $\beta_1$  the effect size;  $X$  the similarity matrix based on the  
544 CRISPR-Cas9 gene fitness measurements;  $\mu$  is the random effects;  $\varepsilon$  is the general noise  
545 term. For each drug, cell lines with missing values were dropped from the fit.

546

547 We statistically assessed the significance of each association by performing likelihood  
548 ratio tests between the alternative model ( $\hat{\theta}_1$ ) and the null model which excludes the gene  
549 CRISPR gene fitness scores vector  $e$  and its parameter  $\beta_1(\hat{\theta}_0)$ . The parameter inference is  
550 performed using maximum likelihood estimation:

551

$$552 [2] \quad \hat{\theta} = \operatorname{argmax} p(d | M, X; \theta)$$

553

554 And the p-value of the association is defined by:

555

556 [3] 
$$\frac{p(d | M, X; \hat{\theta}_0)}{p(d | M, X; \hat{\theta}_1)}$$

557

558 We tested all the single-feature pairwise associations between the 480 compounds  
559 and the 16,643 genes, making a total of 7,988,640 tested associations. P-value adjustment  
560 for multiple testing was performed per drug using the Benjamini-Hochberg False Discovery  
561 Rate (FDR). Contrary to performing the adjustment across all tests, per drug correction has  
562 the following benefits: (i) associations assembled from the different screening platforms  
563 (GDSC1 and GDSC2) are kept separate hence not biasing for measurement type; and (ii)  
564 drugs with stronger responses across larger subsets of cancer cell lines, for example Nutlin-  
565 3a response across TP53 wild-type cell lines, display stronger associations than most drugs,  
566 thus correcting across all drugs would retain more associations from these drugs at a specific  
567 error rate, i.e. 10%, compared to the rest.

## 568 6. Protein-protein interaction network

569 We assembled from STRING database (Szklarczyk *et al*, 2017) a high confidence  
570 undirected protein-protein interaction network. We only consider interactions with a combined  
571 confidence score higher than 900. Nodes' STRING identifiers were converted to HUGO gene  
572 symbols, nodes not mapping or with multiple mappings were removed. Using *igraph* Python  
573 wrapper (Csardi & Nepusz, 2006) the network was simplified by removing unconnected nodes,  
574 self-loops and duplicated edges, leaving a total of 10,587 nodes and 205,251 interactions. A  
575 weighted version of the network was also assembled by correlating the gene fitness profiles  
576 of the connected nodes. Network nodes, and corresponding edges, that were not covered by  
577 the CRISPR-Cas9 screens were removed, making a total of 9,595 nodes and 172,584  
578 weighted interactions.

## 579 7. Robust pharmacogenomic associations

580 Robust pharmacological associations were estimated similarly to the previous  
581 associations, but in this case only drug-gene pairs that are significantly correlated were  
582 considered to test associations with the genomic features (binarised copy number and  
583 mutation status (Iorio *et al*, 2016)) and gene expression profiles (RNA-seq voom (Law *et al*,  
584 2014) transformed RPKMs (Garcia-Alonso *et al*, 2018)). A robust pharmacogenomic  
585 association is defined as: (i) a drug-gene pair whose drug sensitivity and gene fitness is  
586 significantly correlated, and (ii) genomic alteration or gene expression profile is significantly  
587 correlated with both drug response and gene fitness. Log-ratio test p-values are independently  
588 estimated for drug response and gene fitness measurements and corrected per drug-gene.

589 Drug-gene pairs associated to a genomic or gene expression feature with an FDR lower than  
590 10% are called robust pharmacogenomic associations (Supplementary Tables 7 and 8).

## 591 **8. Predictive models of drug response of MCL1 inhibitors**

592 L2-regularised linear regression models to predict MCL1 inhibitors drug response were  
593 trained using gene fitness, gene expression measurements or both of canonical regulators of  
594 *MCL1*, namely *MARCH5*, *MCL1*, *BCL2*, *BCL2L1*, *BCL2L11*, *PMAIP1*, *BAX*, *BAK1*, *BBC3*, *BID*,  
595 *BIK*, *BAD*. For the 9 MCL1 inhibitors considered in this study predictive models of drug  
596 response measurements were trained using Ridge regressions with an internal cross-  
597 validation optimisation of the regularization parameter, implemented in Sklearn with RidgeCV  
598 class (Pedregosa *et al*, 2011). Additionally, drug response measurements are split randomly  
599 1,000 times, where 70% of the measurements are for training the model and 30% are left out  
600 as a test set. Model's performance is quantified using the  $R_2$  metric on the test set, comparing  
601 the predicted versus the observed drug response measurements.

## 602 **9. Code and data availability**

603 Source code, analysis reports and Jupyter notebooks are publicly available in GitHub  
604 project <https://github.com/EmanuelGoncalves/dtrace>. Drug response and gene fitness  
605 CRISPR-Cas9 data-sets used in this analysis are available in the supplementary tables and  
606 accessible through figshare on <https://doi.org/10.6084/m9.figshare.10338413.v1>.

607

608 **Supplementary Figures**

609

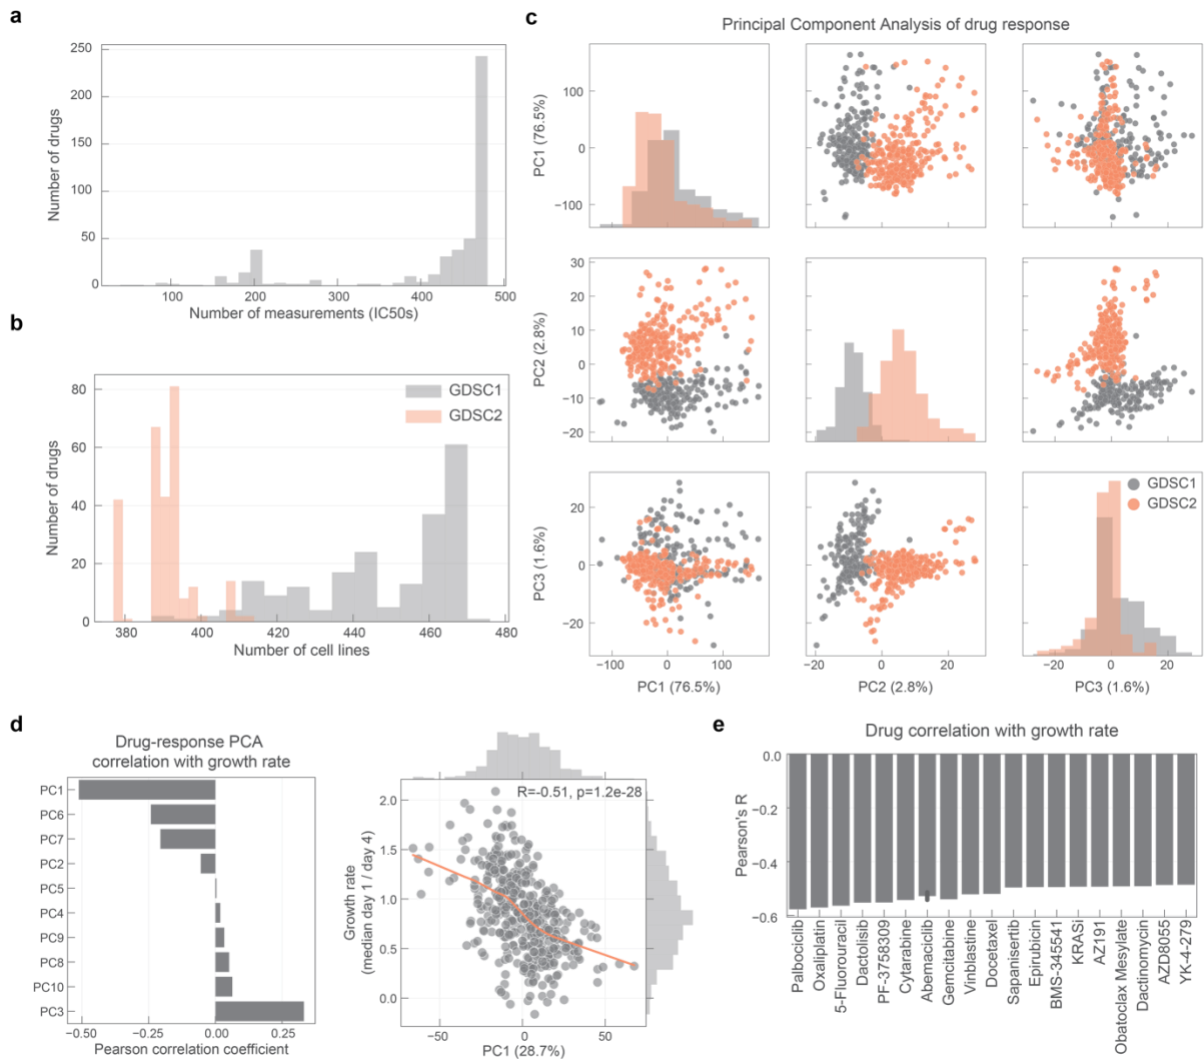

610

611 **Supplementary Figure 1. Overview of the drug sensitivity datasets. a**, histogram of the number of IC50 values

612 measured per drug. **b**, number of drugs measured per cell line in each pharmacological dataset. **c**, PCA analysis

613 of the drug response measurements separated by the screen type. **d**, Pearson correlation coefficient between each

614 principal component (PC) and cell lines growth rate. **e**, top absolutely correlated drugs with growth rate.

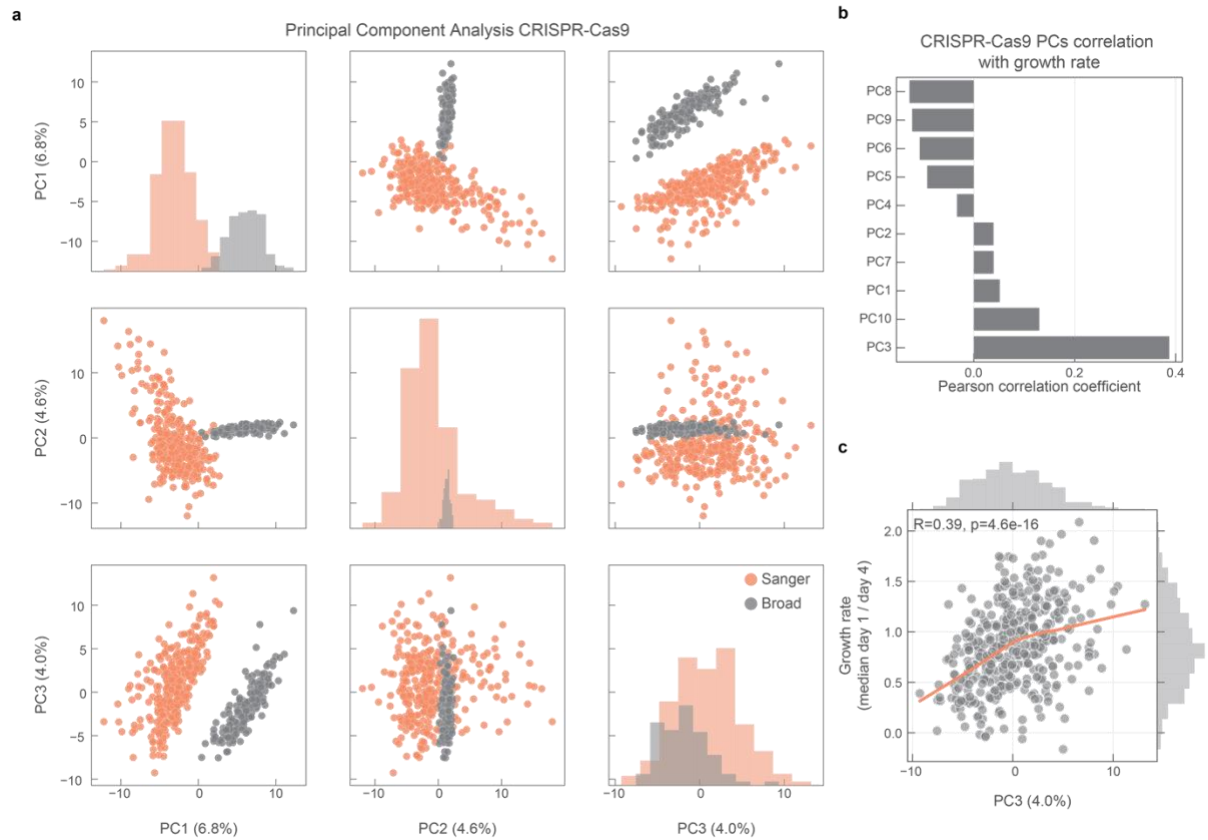

615

616 **Supplementary Figure 2. Overview of the CRISPR-Cas9 datasets.** **a**, PCA analysis of the samples in the  
617 CRISPR-Cas9 screens, samples institute of origin is highlighted. **b**, correlation coefficients between all top 10 PCs  
618 and growth rate. **c**, correlation between cell lines growth rate and PC3 (Pearson correlation coefficient reported in  
619 the top left).

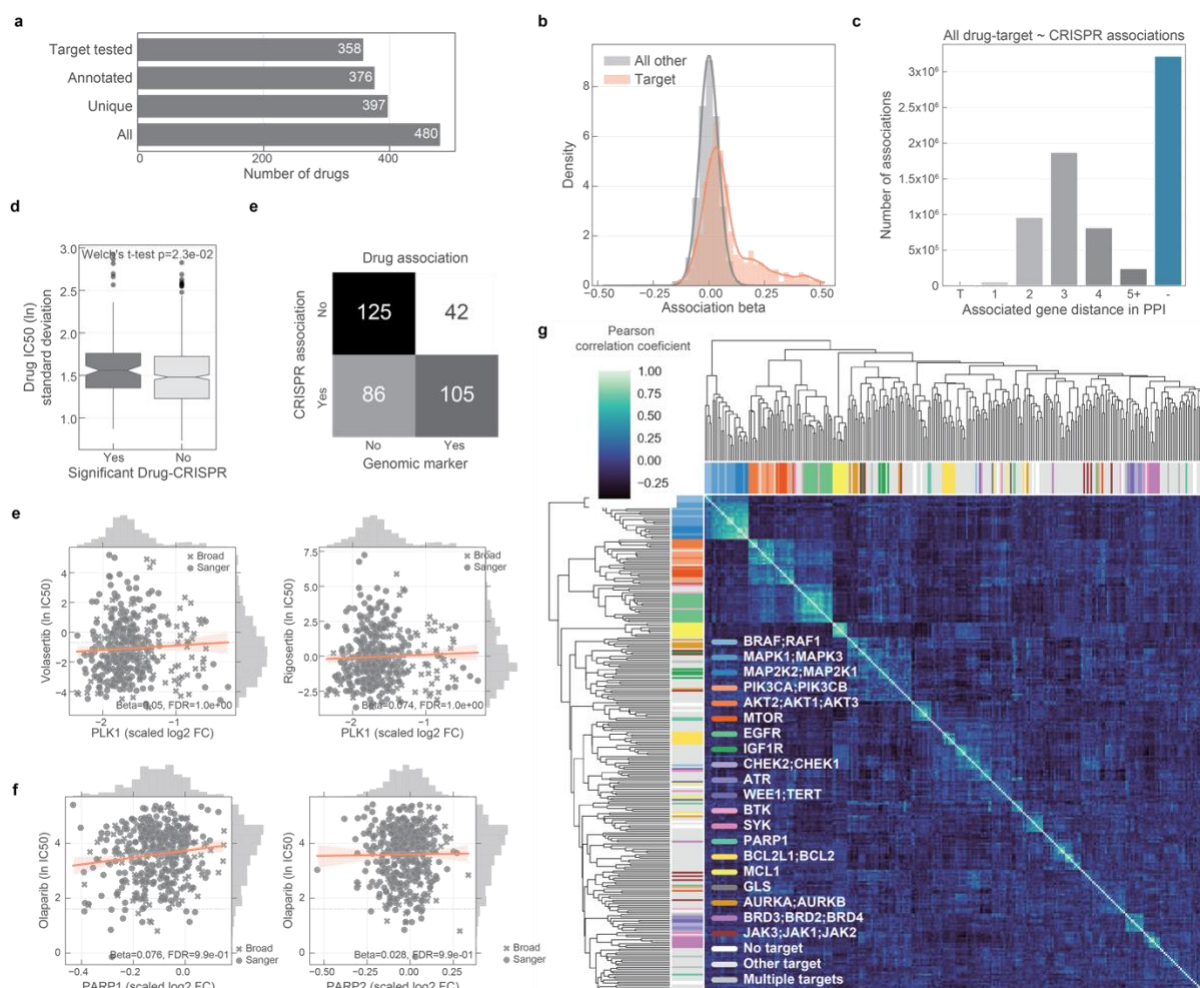

620

621

622

623

624

625

626

627

628

629

630

631

632

633

634

635

**Supplementary Figure 3. Drug response and gene fitness associations.** **a**, total number of drugs utilised in the study and the different levels of information available: 'All' represents all the drugs including replicates screened with different technologies (GDSC1 and GDSC2); 'Unique' counts the number of unique drug names; 'Annotated' shows the number of unique drugs with manual annotation of nominal targets; and 'Target tested' represents the number of unique drugs, with target information, for which the target has been knocked-out in the CRISPR-Cas9 screens. **b**, histogram of the drug-gene associations effect sizes (beta) highlighting drug-target associations. **c**, distribution of the shortest path lengths between all the tested drug-gene pairs. For drugs with multiple targets the smallest shortest path of all the targets was taken. **d**, PLK1 inhibitors drug response correlation with PLK1 knockout log2 fold change (FC) gene fitness effects. The dashed grey line indicates the dose response highest drug concentration. **e**, similar to d, correlation of olaparib drug response and both targets PARP1 and PARP2 gene fitness effects. **f**, drug-target associations split by significance (FDR < 10%) plotted against the standard deviation of the drug IC50 (ln) measurements of the respective pair. **g**, contingency matrix of significant drug associations with CRISPR fold changes and binarised event matrix of genomic features, i.e. mutations and copy number gain or loss. **h**, correlation heatmap of the drug-gene effect size across all the genes. Drugs are coloured according to their targets.

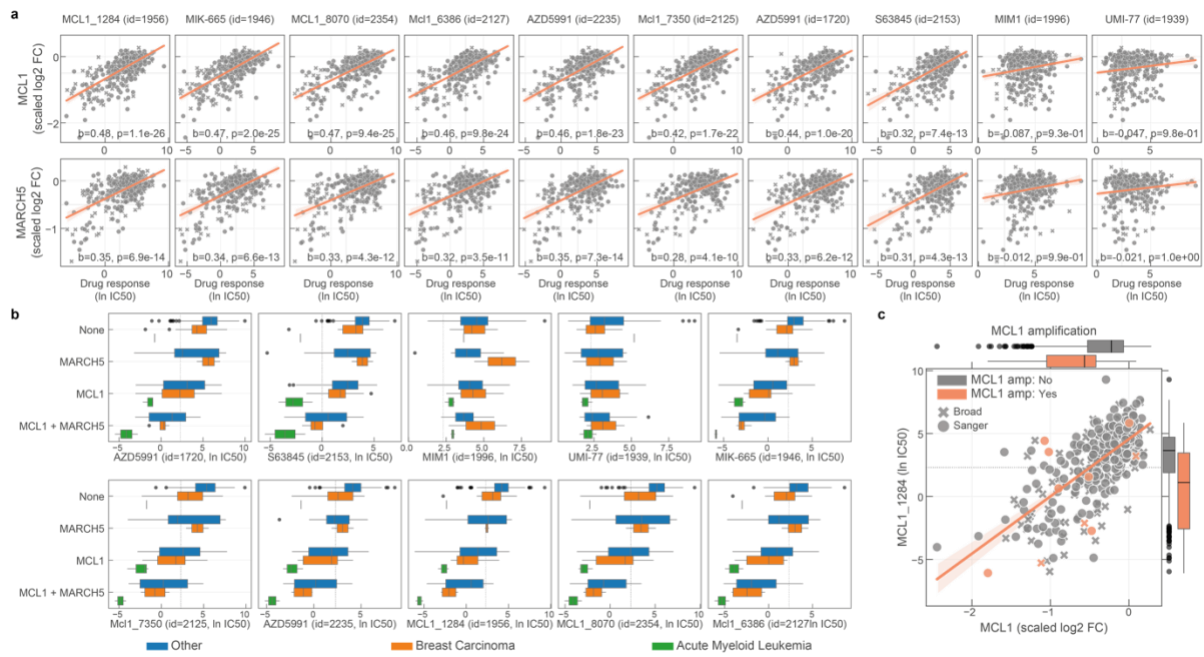

636

637 **Supplementary Figure 4. MCL1 inhibitors.** **a**, correlation of all MCL1 inhibitor IC<sub>50</sub> values against MCL1 and  
 638 MARCH5 gene fitness profiles. Effect sizes (**b**) and FDR (**p**) of the association are reported on the bottom. **b**,  
 639 stratification of the MCL1 inhibitors drug response measurements according to the cell line dependency on  
 640 MARCH5 and/or MCL1. Gene vulnerabilities are independent from each other, meaning knockouts were introduced  
 641 independently and not at the same time. Responses are then split according to the cancer type of the cell lines.  
 642 Vulnerable cell lines to MARCH5 and MCL1 knockout were defined as those with a depletion of at least 50% of  
 643 that visible for essential genes (scaled log<sub>2</sub> fold change < -0.5). **c**, representative example of a MCL1 inhibitor and  
 644 their relation with MCL1 gene fitness, with cell lines containing copy number amplification of MCL1 highlighted in  
 645 orange. Copy number amplified cells were defined taking into consideration their ploidy status, cells with (ploidy ≤  
 646 2.7 and copy number ≥ 5) or (ploidy > 2.7 and copy number ≥ 9) were considered as having MCL1 amplified.



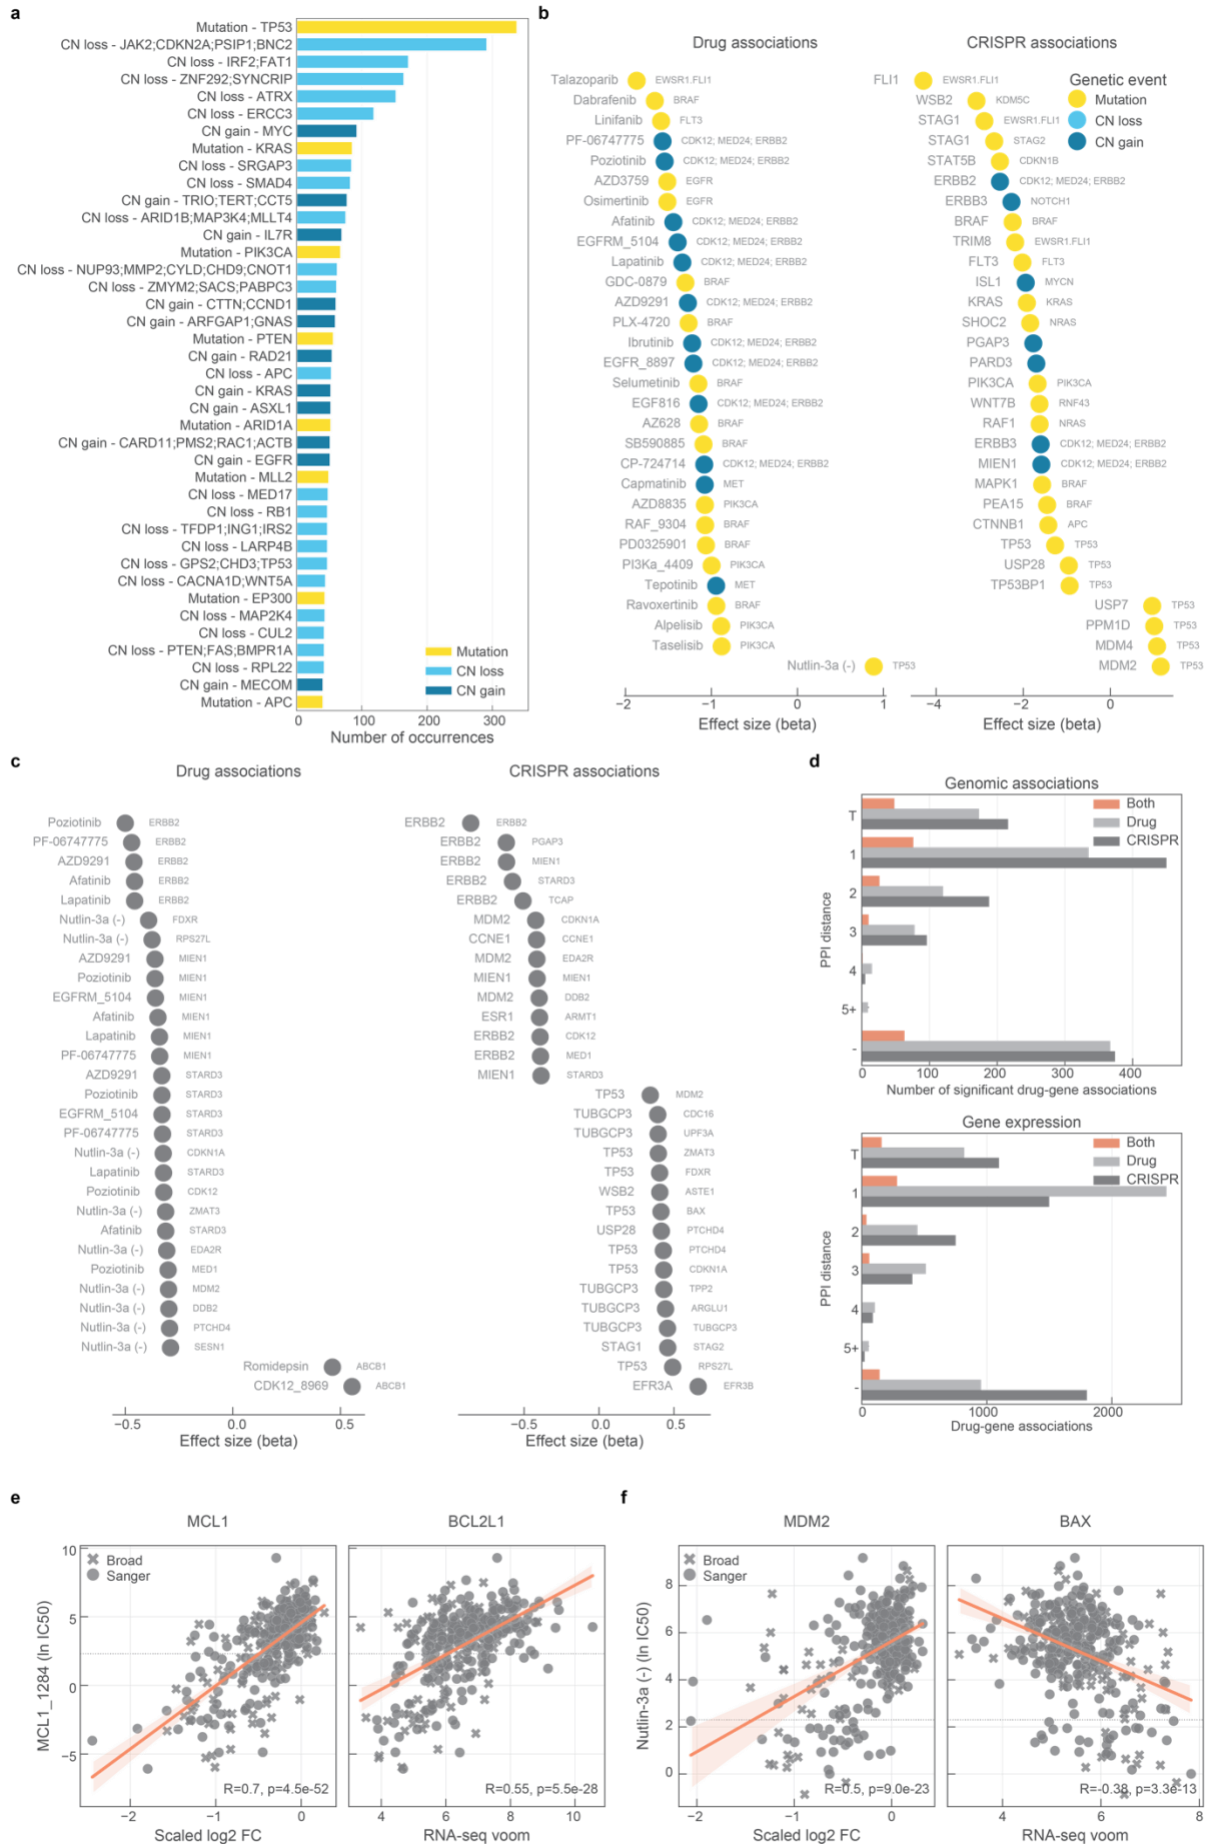

648 **Supplementary Figure 5. Robust pharmacological associations.** *a*, most frequent genomic alterations across  
649 the cancer cell lines. Most significant associations between *b*, genomic features and *c*, gene expression profiles  
650 with drug response and gene fitness. *d*, number of significant drug-gene pairs across the different types of  
651 interactions. Drug-gene pairs were categorised considering the shortest path length between the drug targets and  
652 the associated gene. *e*, robust pharmacological association between the expression of *BCL2L1* and the  
653 significantly correlated pair of *MCL1\_1284* drug and *MCL1* gene fitness profile. *f*, similarly to *e*, but instead it  
654 represents a robust pharmacological association between *BAX* and *MDM2* and *Nutlin-3a*.

## 655 **Supplementary Table Legends**

656 **Supplementary Table 1.** Annotated list of the cancer cell lines used in this study.  
657 **Supplementary Table 2.** List of cancer drugs considered in the study.  
658 **Supplementary Table 3.** Drug response matrix (natural log IC50s) for 480 cancer drugs.  
659 **Supplementary Table 4.** Gene fitness CRISPR-Cas9 scaled fold change.  
660 **Supplementary Table 5.** Significant drug-CRISPR associations.  
661 **Supplementary Table 6.** Significant drug-gene expression associations.  
662 **Supplementary Table 7.** Significant robust pharmacogenomic associations with genomic  
663 mutation and copy number alterations.  
664 **Supplementary Table 8.** Significant robust pharmacogenomic associations with gene  
665 expression.

## 666 **Acknowledgements**

667 We would like to thank all members of the Translational Cancer Genomics team who  
668 provided useful insight. We are grateful for the diligent contributions of Jon Winter-Holt in terms  
669 of compound identification and data clearance and Pedro Beltrao for helpful discussions. Work  
670 in M.J.G lab was funded by Wellcome (206194) and AstraZeneca.

## 671 **Author contributions**

672 Conceptualization E.G. and M.G.; Formal analysis E.G.; Data curation E.G., C.P., D.v.d.M.,  
673 A.B., H.L., J.L., B.S., C.C., F.I., S.F. and M.G.; Drug response acquisition and processing D.v.d.M.,  
674 A.B., H.L. and GDSC Screening Team; Drug annotation E.G., A.S., G.P., F.M.B, P.J., E.C., A.L., C.C.  
675 and M.J.G.; Writing original draft preparation E.G. and M.G.; Writing, reviewing and editing all  
676 authors; Visualisation E.G.; Supervision: A.L., J.L., B.S., C.C., F.I., S.F. and M.J.G.; Funding  
677 acquisition: S.F. and M.J.G.

## 678 **Conflict of interest**

679 This work was funded in part by AstraZeneca. M.J.G. receives funding from AstraZeneca.  
680 M.J.G. and F.I. receive funding from Open Targets, a public-private initiative involving  
681 academia and industry. M.J.G. and F.I. perform consulting for the CRUK-AstraZeneca  
682 Functional Genomics Centre. J.T.L., B.S., C.C. and S.F. are current employees of  
683 AstraZeneca and hold stock in AstraZeneca.

## 684 **References**

- 685 Aguirre AJ, Meyers RM, Weir BA, Vazquez F, Zhang C-Z, Ben-David U, Cook A, Ha G,  
686 Harrington WF, Doshi MB, Kost-Alimova M, Gill S, Xu H, Ali LD, Jiang G, Pantel S, Lee  
687 Y, Goodale A, Cherniack AD, Oh C, et al (2016) Genomic Copy Number Dictates a  
688 Gene-Independent Cell Response to CRISPR/Cas9 Targeting. *Cancer Discov.* **6**: 914–  
689 929
- 690 Barretina J, Caponigro G, Stransky N, Venkatesan K, Margolin AA, Kim S, Wilson CJ, Lehár  
691 J, Kryukov GV, Sonkin D, Reddy A, Liu M, Murray L, Berger MF, Monahan JE, Morais  
692 P, Meltzer J, Korejwa A, Jané-Valbuena J, Mapa FA, et al (2012) The Cancer Cell Line  
693 Encyclopedia enables predictive modelling of anticancer drug sensitivity. *Nature* **483**:  
694 603–607
- 695 Behan FM, Iorio F, Picco G, Gonçalves E, Beaver CM, Migliardi G, Santos R, Rao Y, Sassi  
696 F, Pinnelli M, Ansari R, Harper S, Jackson DA, McRae R, Pooley R, Wilkinson P, van  
697 der Meer D, Dow D, Buser-Doepner C, Bertotti A, et al (2019) Prioritization of cancer  
698 therapeutic targets using CRISPR-Cas9 screens. *Nature* **568**: 511–516
- 699 Ben-David U, Siranosian B, Ha G, Tang H, Oren Y, Hinohara K, Strathdee CA, Dempster J,  
700 Lyons NJ, Burns R, Nag A, Kugener G, Cimini B, Tsvetkov P, Maruvka YE, O'Rourke R,  
701 Garrity A, Tubelli AA, Bandopadhyay P, Tsherniak A, et al (2018) Genetic and  
702 transcriptional evolution alters cancer cell line drug response. *Nature* **560**: 325–330
- 703 Beroukhim R, Mermel CH, Porter D, Wei G, Raychaudhuri S, Donovan J, Barretina J,  
704 Boehm JS, Dobson J, Urashima M, Mc Henry KT, Pinchback RM, Ligon AH, Cho Y-J,  
705 Haery L, Greulich H, Reich M, Winckler W, Lawrence MS, Weir BA, et al (2010) The  
706 landscape of somatic copy-number alteration across human cancers. *Nature* **463**: 899–  
707 905
- 708 Beug ST, Cheung HH, LaCasse EC & Korneluk RG (2012) Modulation of immune signalling  
709 by inhibitors of apoptosis. *Trends Immunol.* **33**: 535–545
- 710 Casale FP, Horta D, Rakitsch B & Stegle O (2017) Joint genetic analysis using variant sets  
711 reveals polygenic gene-context interactions. *PLoS Genet.* **13**: e1006693
- 712 Cook D, Brown D, Alexander R, March R, Morgan P, Satterthwaite G & Pangalos MN (2014)  
713 Lessons learned from the fate of AstraZeneca's drug pipeline: a five-dimensional  
714 framework. *Nat. Rev. Drug Discov.* **13**: 419–431
- 715 Csardi G & Nepusz T (2006) The igraph software package for complex network research.  
716 *InterJournal Complex Systems*: Available at: <http://igraph.org>

- 717 Czabotar PE, Lessene G, Strasser A & Adams JM (2014) Control of apoptosis by the BCL-2  
718 protein family: implications for physiology and therapy. *Nat. Rev. Mol. Cell Biol.* **15**: 49–  
719 63
- 720 Deans RM, Morgens DW, Ökesli A, Pillay S, Horlbeck MA, Kampmann M, Gilbert LA, Li A,  
721 Mateo R, Smith M, Glenn JS, Carette JE, Khosla C & Bassik MC (2016) Parallel shRNA  
722 and CRISPR-Cas9 screens enable antiviral drug target identification. *Nat. Chem. Biol.*  
723 **12**: 361–366
- 724 Dempster JM, Pacini C, Pantel S, Behan FM, Green T, Krill-Burger J, Beaver CM, Zhivich V,  
725 Najgebauer H, Allen F, Gonçalves E, Shepherd R, Doench JG, Yusa K, Vazquez F,  
726 Parts L, Boehm JS, Golub TR, Hahn WC, Root DE, et al (2019) Agreement between  
727 two large pan-cancer CRISPR-Cas9 gene dependency datasets. *bioRxiv*: 604447  
728 Available at: <https://www.biorxiv.org/content/10.1101/604447v2> [Accessed May 31,  
729 2019]
- 730 DepMap B (2019) DepMap 19Q3 Public. Available at:  
731 [https://figshare.com/articles/DepMap\\_19Q3\\_Public/9201770](https://figshare.com/articles/DepMap_19Q3_Public/9201770)
- 732 DeWeirdt PC, Sanson KR, Hanna RE, Hegde M, Sangree AK, Strand C, Persky NS &  
733 Doench JG (2019) Genetic screens in isogenic mammalian cell lines without single cell  
734 cloning. *bioRxiv*: 677385 Available at:  
735 <https://www.biorxiv.org/content/10.1101/677385v1> [Accessed June 24, 2019]
- 736 Doench JG, Fusi N, Sullender M, Hegde M, Vaimberg EW, Donovan KF, Smith I, Tothova Z,  
737 Wilen C, Orchard R, Virgin HW, Listgarten J & Root DE (2016) Optimized sgRNA  
738 design to maximize activity and minimize off-target effects of CRISPR-Cas9. *Nat.*  
739 *Biotechnol.* **34**: 184–191
- 740 Garcia-Alonso L, Iorio F, Matchan A, Fonseca N, Jaaks P, Peat G, Pignatelli M, Falcone F,  
741 Benes CH, Dunham I, Bignell G, McDade SS, Garnett MJ & Saez-Rodriguez J (2018)  
742 Transcription Factor Activities Enhance Markers of Drug Sensitivity in Cancer. *Cancer*  
743 *Res.* **78**: 769–780
- 744 Garnett MJ, Edelman EJ, Heidorn SJ, Greenman CD, Dastur A, Lau KW, Greninger P,  
745 Thompson IR, Luo X, Soares J, Liu Q, Iorio F, Surdez D, Chen L, Milano RJ, Bignell  
746 GR, Tam AT, Davies H, Stevenson JA, Barthorpe S, et al (2012) Systematic  
747 identification of genomic markers of drug sensitivity in cancer cells. *Nature* **483**: 570–  
748 575
- 749 Gill SJ, Travers J, Pshenichnaya I, Kogera FA, Barthorpe S, Mironenko T, Richardson L,  
750 Benes CH, Stratton MR, McDermott U & Others (2015) Combinations of PARP  
751 inhibitors with temozolomide drive PARP1 trapping and apoptosis in Ewing’s sarcoma.  
752 *PLoS One* **10**: e0140988
- 753 Gonçalves E, Behan FM, Louzada S, Arnol D, Stronach EA, Yang F, Yusa K, Stegle O, Iorio  
754 F & Garnett MJ (2019) Structural rearrangements generate cell-specific, gene-  
755 independent CRISPR-Cas9 loss of fitness effects. *Genome Biol.* **20**: 27
- 756 Hart T, Chandrashekar M, Aregger M, Steinhart Z, Brown KR, MacLeod G, Mis M,  
757 Zimmermann M, Fradet-Turcotte A, Sun S, Mero P, Dirks P, Sidhu S, Roth FP, Rissland  
758 OS, Durocher D, Angers S & Moffat J (2015) High-Resolution CRISPR Screens Reveal  
759 Fitness Genes and Genotype-Specific Cancer Liabilities. *Cell* **163**: 1515–1526
- 760 Hird AW, Paul Secrist J, Adam A, Belmonte MA, Gangl E, Gibbons F, Hargreaves D,  
761 Johannes JW, Kazmirski SL, Kettle JG, Kurtz SE, Lamb ML, Packer MJ, Peng B,

- 762 Stewart CR, Tyner JW, Yang W, Ye Q, Zheng X & Clark EA (2017) Abstract DDT01-02:  
763 AZD5991: A potent and selective macrocyclic inhibitor of Mcl-1 for treatment of  
764 hematologic cancers. *Cancer Res.* **77**: DDT01-02-DDT01-02
- 765 Iorio F, Behan FM, Gonçalves E, Bhosle SG, Chen E, Shepherd R, Beaver C, Ansari R,  
766 Pooley R, Wilkinson P, Harper S, Butler AP, Stronach EA, Saez-Rodriguez J, Yusa K &  
767 Garnett MJ (2018) Unsupervised correction of gene-independent cell responses to  
768 CRISPR-Cas9 targeting. *BMC Genomics* **19**: 604
- 769 Iorio F, Knijnenburg TA, Vis DJ, Bignell GR, Menden MP, Schubert M, Aben N, Gonçalves  
770 E, Barthorpe S, Lightfoot H, Cokelaer T, Greninger P, van Dyk E, Chang H, de Silva H,  
771 Heyn H, Deng X, Egan RK, Liu Q, Mironenko T, et al (2016) A Landscape of  
772 Pharmacogenomic Interactions in Cancer. *Cell* **166**: 740–754
- 773 Jinek M, Chylinski K, Fonfara I, Hauer M, Doudna JA & Charpentier E (2012) A  
774 programmable dual-RNA-guided DNA endonuclease in adaptive bacterial immunity.  
775 *Science* **337**: 816–821
- 776 Jost M & Weissman JS (2018) CRISPR Approaches to Small Molecule Target Identification.  
777 *ACS Chem. Biol.* **13**: 366–375
- 778 Karbowski M, Neutzner A & Youle RJ (2007) The mitochondrial E3 ubiquitin ligase MARCH5  
779 is required for Drp1 dependent mitochondrial division. *J. Cell Biol.* **178**: 71–84
- 780 Klaeger S, Heinzlmeir S, Wilhelm M, Polzer H, Vick B, Koenig P-A, Reinecke M, Ruprecht B,  
781 Petzoldt S, Meng C, Zecha J, Reiter K, Qiao H, Helm D, Koch H, Schoof M, Canevari G,  
782 Casale E, Depaolini SR, Feuchtinger A, et al (2017) The target landscape of clinical  
783 kinase drugs. *Science* **358**: eaan4368
- 784 Koike-Yusa H, Li Y, Tan E-P, Velasco-Herrera MDC & Yusa K (2014) Genome-wide  
785 recessive genetic screening in mammalian cells with a lentiviral CRISPR-guide RNA  
786 library. *Nat. Biotechnol.* **32**: 267–273
- 787 Law CW, Chen Y, Shi W & Smyth GK (2014) voom: Precision weights unlock linear model  
788 analysis tools for RNA-seq read counts. *Genome Biol.* **15**: R29
- 789 Lee J-K, Liu Z, Sa JK, Shin S, Wang J, Bordyuh M, Cho HJ, Elliott O, Chu T, Choi SW,  
790 Rosenbloom DIS, Lee I-H, Shin YJ, Kang HJ, Kim D, Kim SY, Sim M-H, Kim J, Lee T,  
791 Seo YJ, et al (2018) Pharmacogenomic landscape of patient-derived tumor cells informs  
792 precision oncology therapy. *Nat. Genet.* **50**: 1399–1411
- 793 Li J, Zhao W, Akbani R, Liu W, Ju Z, Ling S, Vellano CP, Roebuck P, Yu Q, Eterovic AK,  
794 Byers LA, Davies MA, Deng W, Gopal YNV, Chen G, von Euw EM, Slamon D, Conklin  
795 D, Heymach JV, Gazdar AF, et al (2017) Characterization of Human Cancer Cell Lines  
796 by Reverse-phase Protein Arrays. *Cancer Cell* **31**: 225–239
- 797 Lin A, Giuliano CJ, Palladino A, John KM, Abramowicz C, Yuan ML, Sausville EL, Lukow  
798 DA, Liu L, Chait AR, Galluzzo ZC, Tucker C & Sheltzer JM (2019) Off-target toxicity is a  
799 common mechanism of action of cancer drugs undergoing clinical trials. *Sci. Transl.  
800 Med.* **11**: Available at: <http://dx.doi.org/10.1126/scitranslmed.aaw8412>
- 801 Lippert C, Casale FP, Rakitsch B & Stegle O (2014) LIMIX: genetic analysis of multiple traits.  
802 *bioRxiv*: 003905 Available at: <http://www.biorxiv.org/content/early/2014/05/22/003905>  
803 [Accessed December 14, 2017]
- 804 Lynch JT, McEwen R, Crafter C, McDermott U, Garnett MJ, Barry ST & Davies BR (2016)

- 805 Identification of differential PI3K pathway target dependencies in T-cell acute  
806 lymphoblastic leukemia through a large cancer cell panel screen. *Oncotarget* **7**: 22128–  
807 22139
- 808 Marcotte R, Sayad A, Brown KR, Sanchez-Garcia F, Reimand J, Haider M, Virtanen C,  
809 Bradner JE, Bader GD, Mills GB, Pe'er D, Moffat J & Neel BG (2016) Functional  
810 Genomic Landscape of Human Breast Cancer Drivers, Vulnerabilities, and Resistance.  
811 *Cell* **164**: 293–309
- 812 van der Meer D, Barthorpe S, Yang W, Lightfoot H, Hall C, Gilbert J, Francies HE & Garnett  
813 MJ (2019) Cell Model Passports—a hub for clinical, genetic and functional datasets of  
814 preclinical cancer models. *Nucleic Acids Res.* **47**: D923–D929
- 815 Meyers RM, Bryan JG, McFarland JM, Weir BA, Sizemore AE, Xu H, Dharia NV,  
816 Montgomery PG, Cowley GS, Pantel S, Goodale A, Lee Y, Ali LD, Jiang G, Lubonja R,  
817 Harrington WF, Strickland M, Wu T, Hawes DC, Zhivich VA, et al (2017) Computational  
818 correction of copy number effect improves specificity of CRISPR-Cas9 essentiality  
819 screens in cancer cells. *Nat. Genet.* **49**: 1779–1784
- 820 Mojsa B, Lassot I & Desagher S (2014) Mcl-1 ubiquitination: unique regulation of an  
821 essential survival protein. *Cells* **3**: 418–437
- 822 Morciano G, Giorgi C, Balestra D, Marchi S, Perrone D, Pinotti M & Pinton P (2016) Mcl-1  
823 involvement in mitochondrial dynamics is associated with apoptotic cell death. *Mol. Biol.*  
824 *Cell* **27**: 20–34
- 825 Munoz DM, Cassiani PJ, Li L, Billy E, Korn JM, Jones MD, Golji J, Ruddy DA, Yu K,  
826 McAllister G, DeWeck A, Abramowski D, Wan J, Shirley MD, Neshat SY, Rakiec D, de  
827 Beaumont R, Weber O, Kauffmann A, McDonald ER 3rd, et al (2016) CRISPR Screens  
828 Provide a Comprehensive Assessment of Cancer Vulnerabilities but Generate False-  
829 Positive Hits for Highly Amplified Genomic Regions. *Cancer Discov.* **6**: 900–913
- 830 Murai J & Pommier Y (2015) Classification of PARP Inhibitors Based on PARP Trapping and  
831 Catalytic Inhibition, and Rationale for Combinations with Topoisomerase I Inhibitors and  
832 Alkylating Agents. In *PARP Inhibitors for Cancer Therapy*, Curtin NJ & Sharma RA (eds)  
833 pp 261–274. Cham: Springer International Publishing
- 834 Nelson MR, Tipney H, Painter JL, Shen J, Nicoletti P, Shen Y, Floratos A, Sham PC, Li MJ,  
835 Wang J, Cardon LR, Whittaker JC & Sanseau P (2015) The support of human genetic  
836 evidence for approved drug indications. *Nat. Genet.* **47**: 856–860
- 837 Pan J, Meyers RM, Michel BC, Mashtalir N, Sizemore AE, Wells JN, Cassel SH, Vazquez F,  
838 Weir BA, Hahn WC, Marsh JA, Tsherniak A & Kadoch C (2018) Interrogation of  
839 Mammalian Protein Complex Structure, Function, and Membership Using Genome-  
840 Scale Fitness Screens. *Cell Syst* **0**: Available at:  
841 <http://dx.doi.org/10.1016/j.cels.2018.04.011> [Accessed May 17, 2018]
- 842 Pedregosa F, Varoquaux G, Gramfort A, Michel V, Thirion B, Grisel O, Blondel M,  
843 Prettenhofer P, Weiss R, Dubourg V, Vanderplas J, Passos A, Cournapeau D, Brucher  
844 M, Perrot M & Duchesnay É (2011) Scikit-learn: Machine Learning in Python. *J. Mach.*  
845 *Learn. Res.* **12**: 2825–2830
- 846 Picco G, Chen ED, Alonso LG, Behan FM, Gonçalves E, Bignell G, Matchan A, Fu B,  
847 Banerjee R, Anderson E, Butler A, Benes CH, McDermott U, Dow D, Iorio F, Stronach  
848 E, Yang F, Yusa K, Saez-Rodriguez J & Garnett MJ (2019) Functional linkage of gene  
849 fusions to cancer cell fitness assessed by pharmacological and CRISPR-Cas9

- 850 screening. *Nat. Commun.* **10**: 2198
- 851 Reinecke M, Ruprecht B, Poser S, Wiechmann S, Wilhelm M, Heinzlmeir S, Kuster B &  
852 Médard G (2019) Chemoproteomic Selectivity Profiling of PIKK and PI3K Kinase  
853 Inhibitors. *ACS Chem. Biol.* **14**: 655–664
- 854 Santos R, Ursu O, Gaulton A, Bento AP, Donadi RS, Bologa CG, Karlsson A, Al-Lazikani B,  
855 Hersey A, Oprea TI & Overington JP (2017) A comprehensive map of molecular drug  
856 targets. *Nat. Rev. Drug Discov.* **16**: 19–34
- 857 Scaltriti M & Baselga J (2006) The epidermal growth factor receptor pathway: a model for  
858 targeted therapy. *Clin. Cancer Res.* **12**: 5268–5272
- 859 Schenone M, Dančik V, Wagner BK & Clemons PA (2013) Target identification and  
860 mechanism of action in chemical biology and drug discovery. *Nat. Chem. Biol.* **9**: 232–  
861 240
- 862 Shalem O, Sanjana NE, Hartenian E, Shi X, Scott DA, Mikkelsen T, Heckl D, Ebert BL, Root  
863 DE, Doench JG & Zhang F (2014) Genome-scale CRISPR-Cas9 knockout screening in  
864 human cells. *Science* **343**: 84–87
- 865 Subramanian A, Narayan R, Corsello SM, Peck DD, Natoli TE, Lu X, Gould J, Davis JF,  
866 Tubelli AA, Asiedu JK, Lahr DL, Hirschman JE, Liu Z, Donahue M, Julian B, Khan M,  
867 Wadden D, Smith IC, Lam D, Liberzon A, et al (2017) A Next Generation Connectivity  
868 Map: L1000 Platform and the First 1,000,000 Profiles. *Cell* **171**: 1437–1452.e17
- 869 Szklarczyk D, Morris JH, Cook H, Kuhn M, Wyder S, Simonovic M, Santos A, Doncheva NT,  
870 Roth A, Bork P, Jensen LJ & von Mering C (2017) The STRING database in 2017:  
871 quality-controlled protein-protein association networks, made broadly accessible.  
872 *Nucleic Acids Res.* **45**: D362–D368
- 873 Thomas G (2002) Furin at the cutting edge: from protein traffic to embryogenesis and  
874 disease. *Nat. Rev. Mol. Cell Biol.* **3**: 753–766
- 875 Thorpe LM, Yuzugullu H & Zhao JJ (2015) PI3K in cancer: divergent roles of isoforms,  
876 modes of activation and therapeutic targeting. *Nat. Rev. Cancer* **15**: 7–24
- 877 Tsherniak A, Vazquez F, Montgomery PG, Weir BA, Kryukov G, Cowley GS, Gill S,  
878 Harrington WF, Pantel S, Krill-Burger JM, Meyers RM, Ali L, Goodale A, Lee Y, Jiang G,  
879 Hsiao J, Gerath WFJ, Howell S, Merkel E, Ghandi M, et al (2017) Defining a Cancer  
880 Dependency Map. *Cell* **170**: 564–576.e16
- 881 Tzelepis K, Koike-Yusa H, De Braekeleer E, Li Y, Metzakopian E, Dovey OM, Mupo A,  
882 Grinkevich V, Li M, Mazan M, Gozdecka M, Ohnishi S, Cooper J, Patel M, McKerrell T,  
883 Chen B, Domingues AF, Gallipoli P, Teichmann S, Ponstingl H, et al (2016) A CRISPR  
884 Dropout Screen Identifies Genetic Vulnerabilities and Therapeutic Targets in Acute  
885 Myeloid Leukemia. *Cell Rep.* **17**: 1193–1205
- 886 Vis DJ, Bombardelli L, Lightfoot H, Iorio F, Garnett MJ & Wessels LF (2016) Multilevel  
887 models improve precision and speed of IC50 estimates. *Pharmacogenomics* **17**: 691–  
888 700
- 889 Wang T, Yu H, Hughes NW, Liu B, Kendirli A, Klein K, Chen WW, Lander ES & Sabatini DM  
890 (2017) Gene Essentiality Profiling Reveals Gene Networks and Synthetic Lethal  
891 Interactions with Oncogenic Ras. *Cell* **168**: 890–903.e15

- 892 Wei G, Twomey D, Lamb J, Schlis K, Agarwal J, Stam RW, Opferman JT, Sallan SE, den  
893 Boer ML, Pieters R, Golub TR & Armstrong SA (2006) Gene expression-based chemical  
894 genomics identifies rapamycin as a modulator of MCL1 and glucocorticoid resistance.  
895 *Cancer Cell* **10**: 331–342
- 896 Wuillème-Toumi S, Robillard N, Gomez P, Moreau P, Le Gouill S, Avet-Loiseau H,  
897 Harousseau J-L, Amiot M & Bataille R (2005) Mcl-1 is overexpressed in multiple  
898 myeloma and associated with relapse and shorter survival. *Leukemia* **19**: 1248–1252
- 899 Yang W, Soares J, Greninger P, Edelman EJ, Lightfoot H, Forbes S, Bindal N, Beare D,  
900 Smith JA, Thompson IR, Ramaswamy S, Futreal PA, Haber DA, Stratton MR, Benes C,  
901 McDermott U & Garnett MJ (2013) Genomics of Drug Sensitivity in Cancer (GDSC): a  
902 resource for therapeutic biomarker discovery in cancer cells. *Nucleic Acids Res.* **41**:  
903 D955–61
- 904 Youle RJ & Karbowski M (2005) Mitochondrial fission in apoptosis. *Nat. Rev. Mol. Cell Biol.*  
905 **6**: 657
- 906 Zheng Y, Zhang C, Croucher DR, Soliman MA, St-Denis N, Pasculescu A, Taylor L, Tate  
907 SA, Hardy WR, Colwill K, Dai AY, Bagshaw R, Dennis JW, Gingras A-C, Daly RJ &  
908 Pawson T (2013) Temporal regulation of EGF signalling networks by the scaffold protein  
909 Shc1. *Nature* **499**: 166–171
- 910



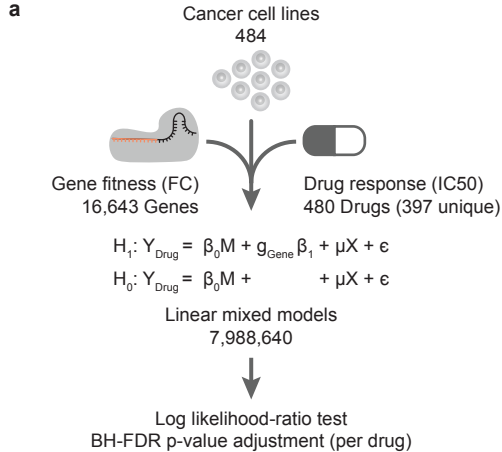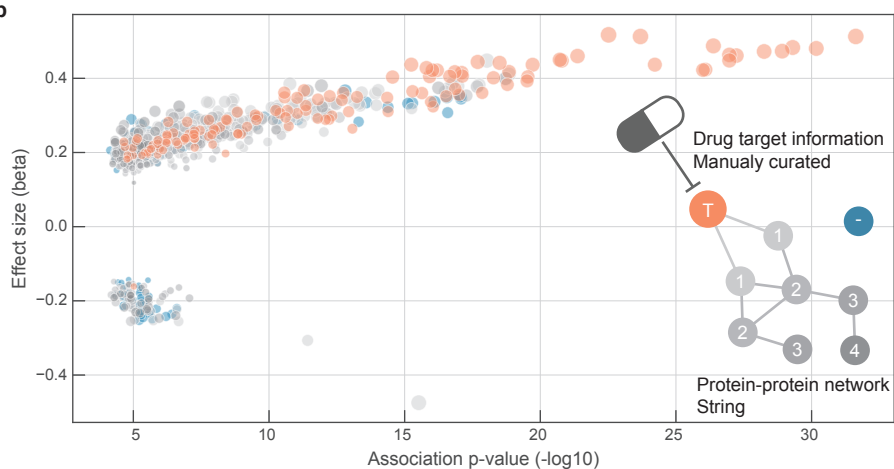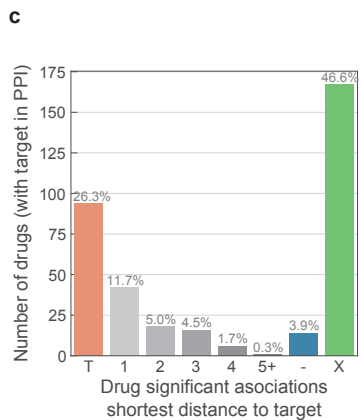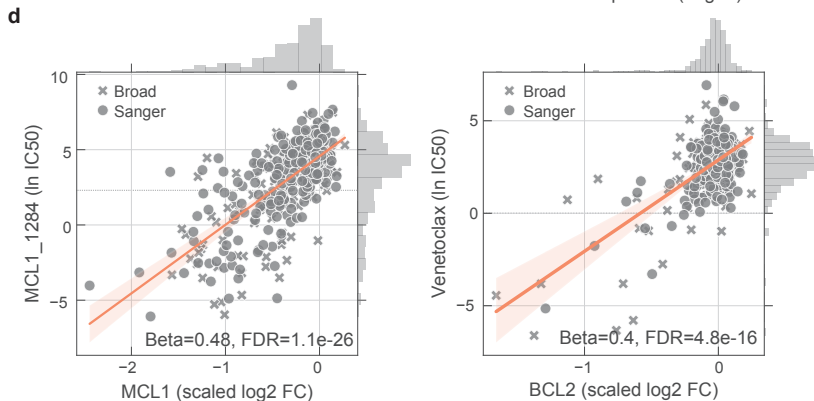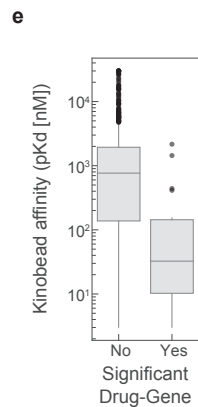

**a**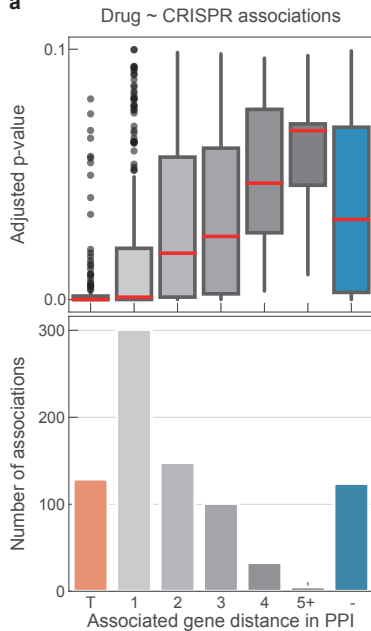**b**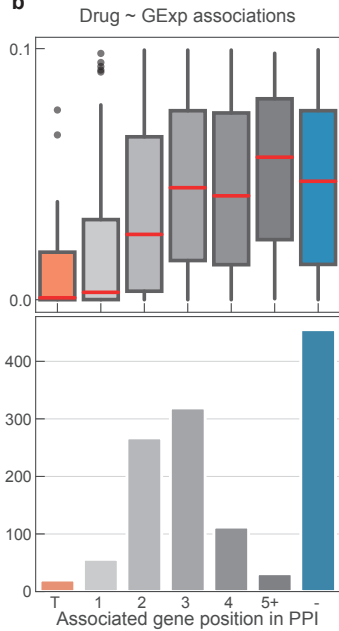**c**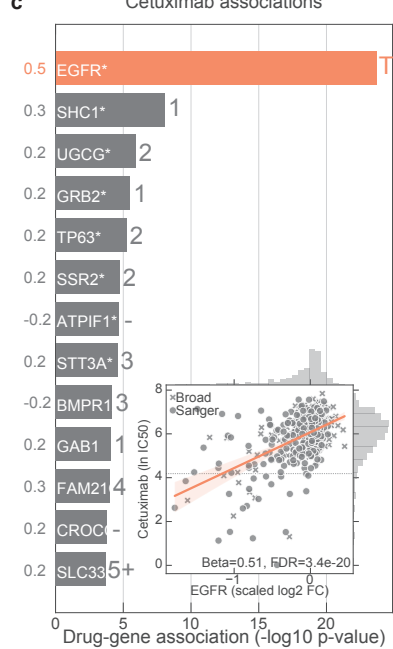**d**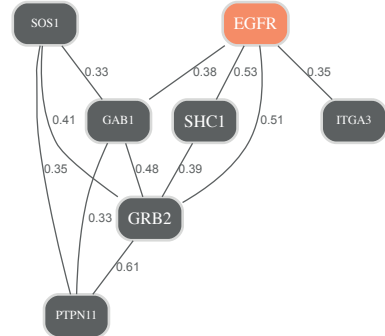**e**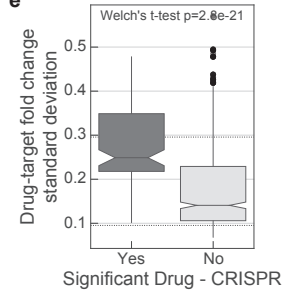

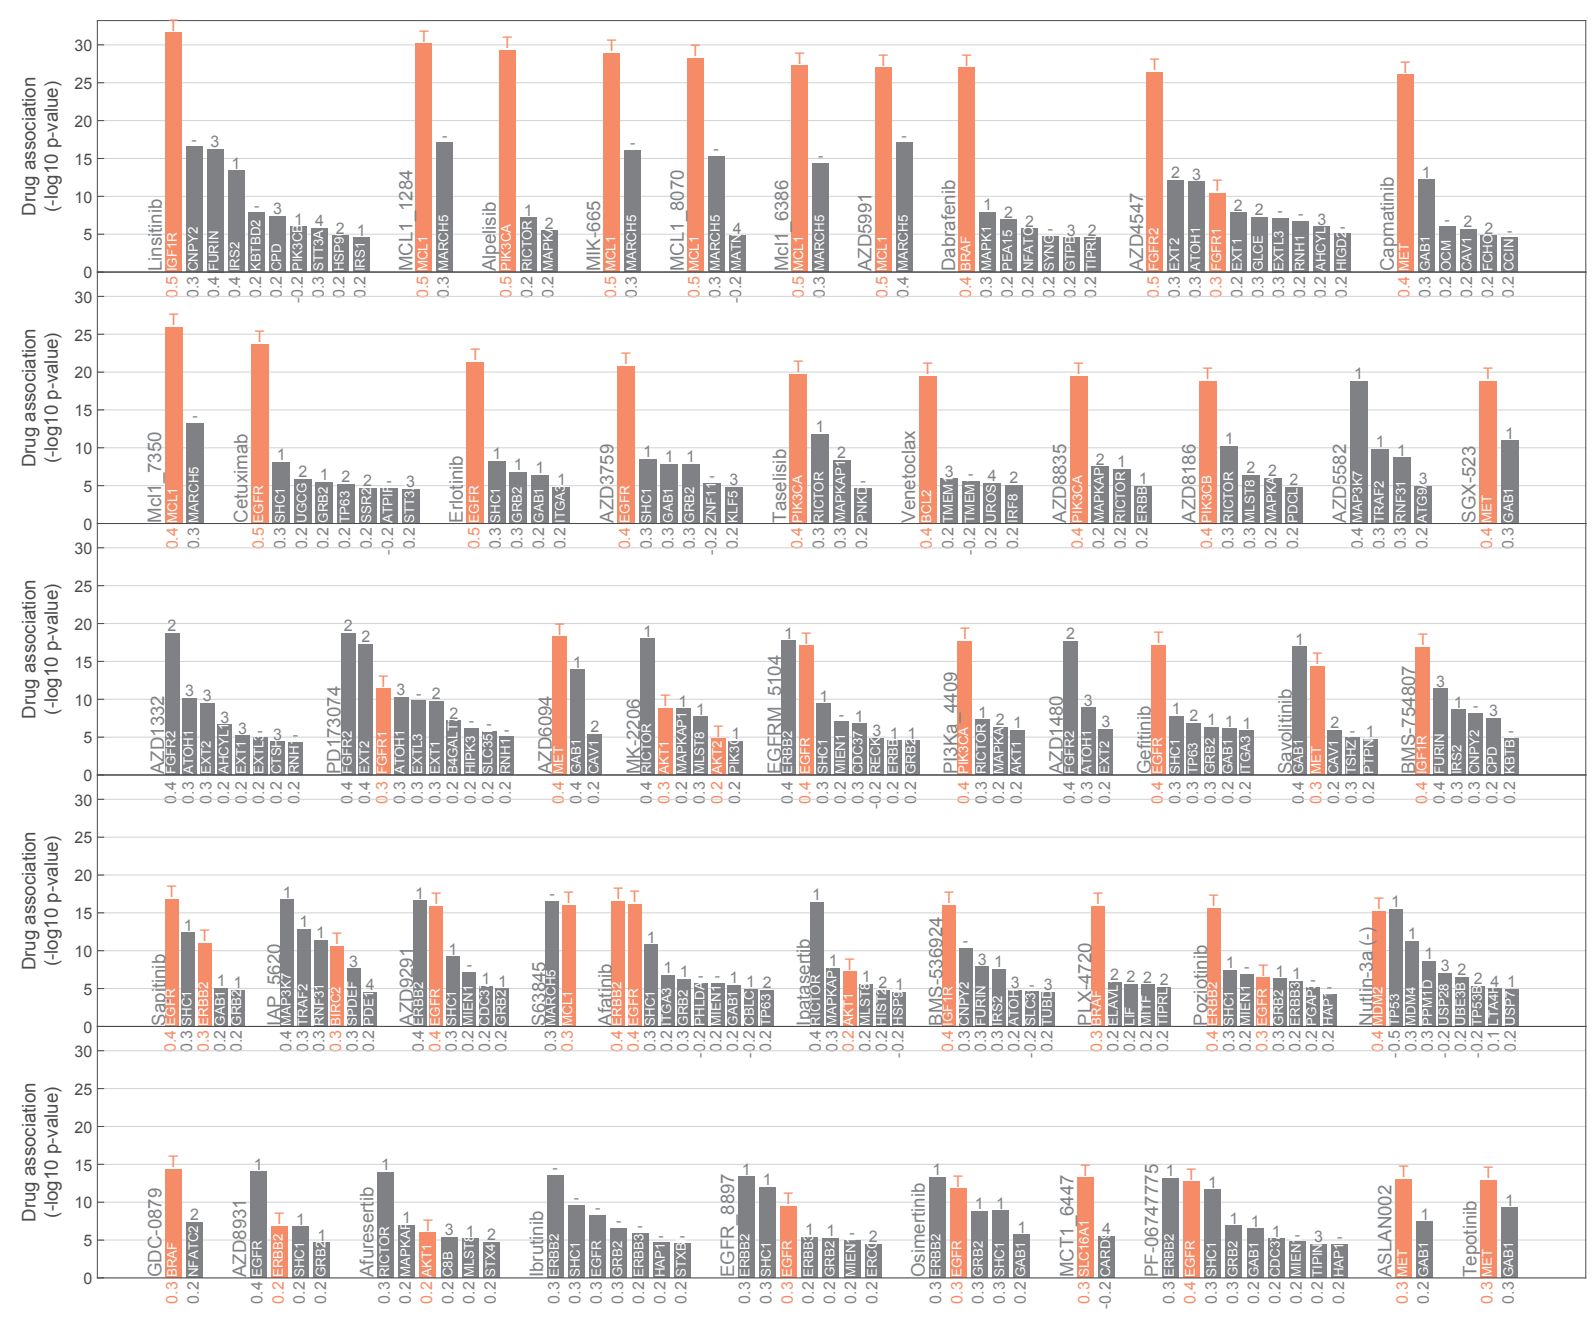

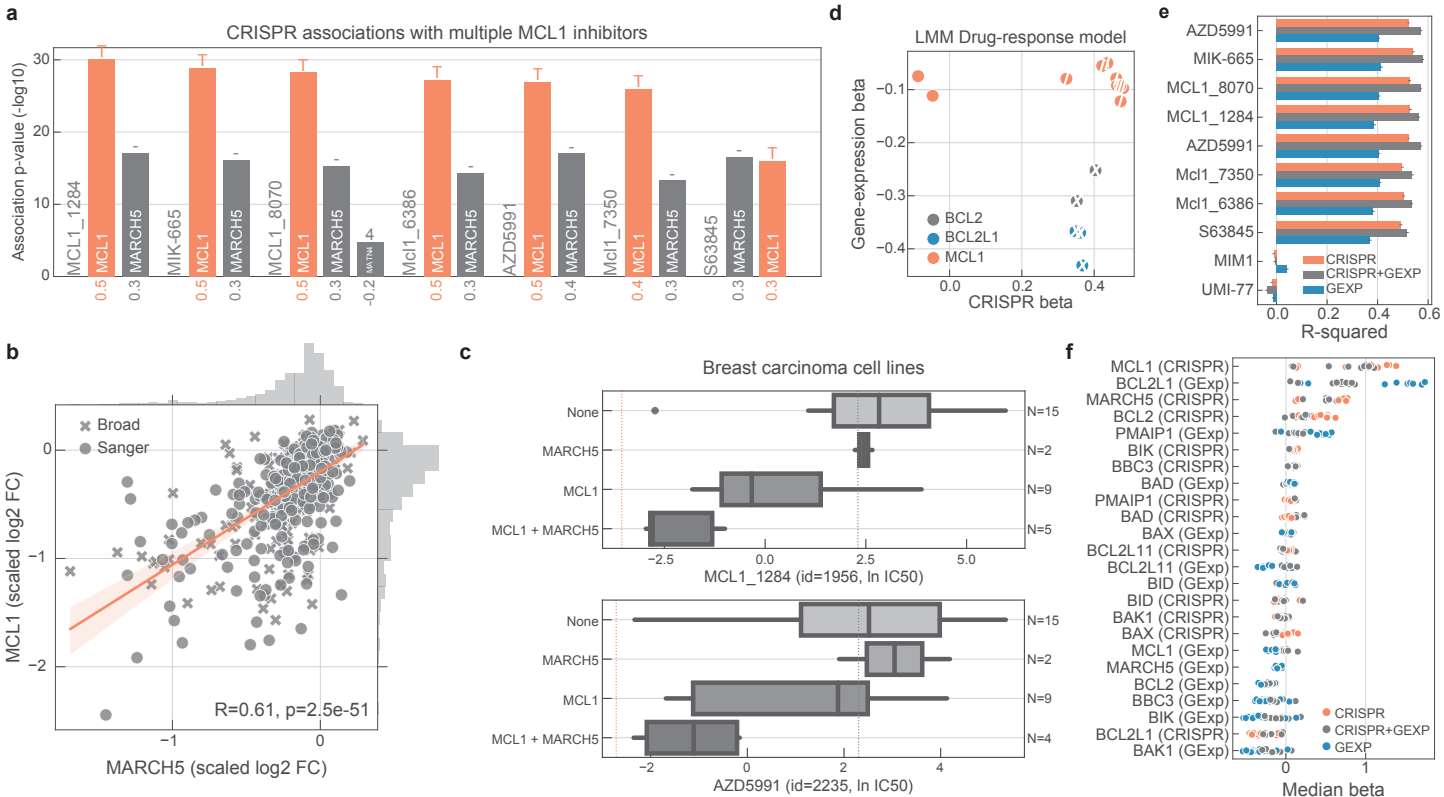

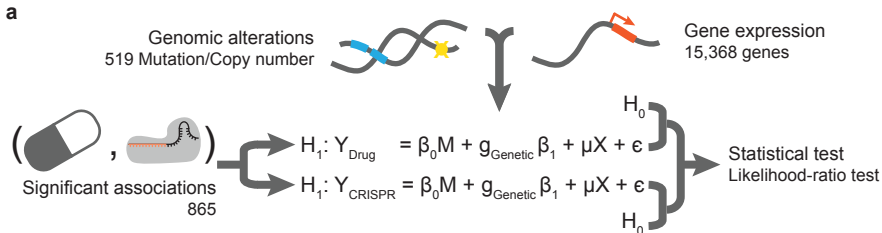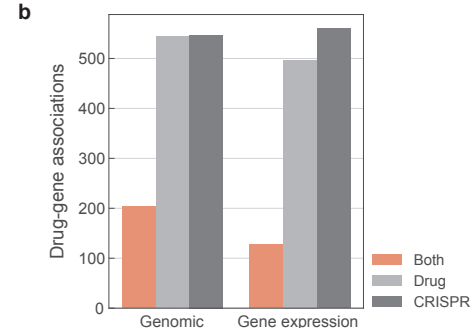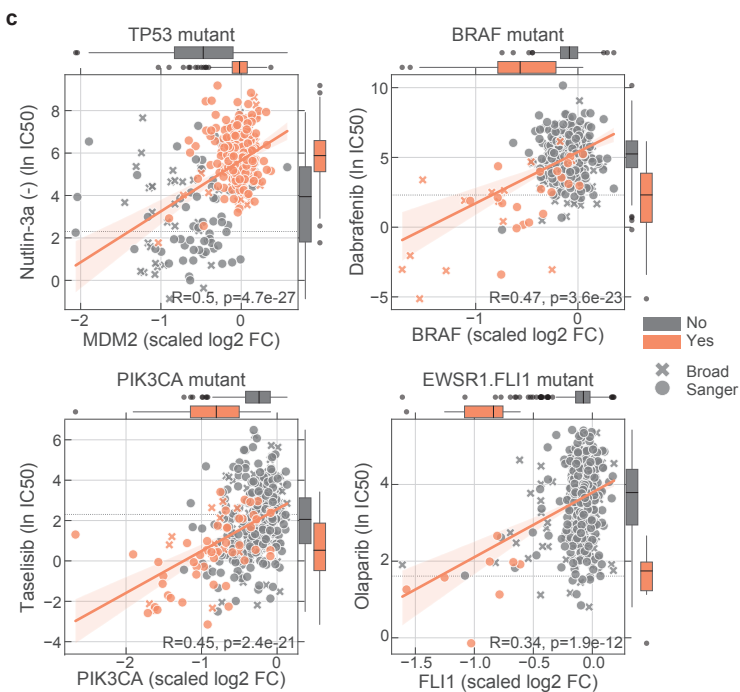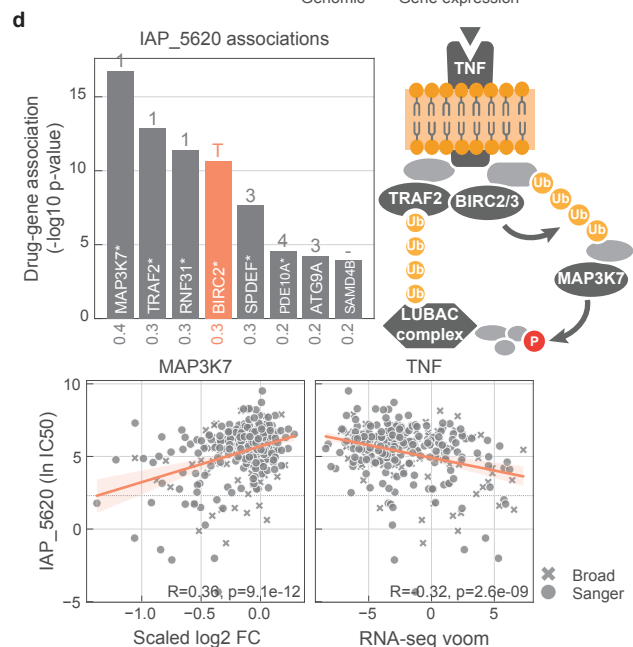

Source: https://www.biorxiv.org/content/biorxiv/early/2020/01/14/2020.01.14.905729.full.pdf
